# Supplementary material
Source: PubMed Central journal article supplement (PMC9364128)
Supplement: jama-e2212000-s002.pdf [file jama-e2212000-s002.pdf]

1 **China Angioplasty & Stenting for Symptomatic Intracranial Severe**  
2 **Stenosis (CASSISS)**

3  
4 **A prospective multi-center, randomized controlled trial (RCT)**  
5

6 **Statistical Analysis**  
7 **Plan**

8  
9 **Ver. 1.0**

10 **Version date: May 10, 2015**  
11

Type of research: Investigator-initiated  
Phase IV clinical trial  
Organizer: Xuanwu Hospital  
Capital Medical University  
Statistical analysis: Clinical Research Institute  
Peking University

12  
13 **Author: \_\_\_\_\_**

14 **Date: \_\_\_\_\_**

15 **Haibo Wang**

16 **Clinical Research Institute of Peking University**  
17

18

## CONTENTS

|    |                                                         |           |
|----|---------------------------------------------------------|-----------|
| 19 | <b>1. ABBREVIATIONS .....</b>                           | <b>5</b>  |
| 20 | <b>2. PROTOCOL ABSTRACT.....</b>                        | <b>7</b>  |
| 21 | 2.1 STUDY PURPOSE .....                                 | 7         |
| 22 | 2.2 STUDY DESIGN.....                                   | 7         |
| 23 | 2.3 SAMPLE SIZE .....                                   | 7         |
| 24 | 2.4 BLINDING AND RANDOMIZATION .....                    | 8         |
| 25 | 2.5 INTERVENTIONS .....                                 | 8         |
| 26 | 2.6 STUDY POPULATION AND DIAGNOSTIC CRITERIA.....       | 9         |
| 27 | <b>2.6.1 Inclusion criteria.....</b>                    | <b>9</b>  |
| 28 | <b>2.6.2 Exclusion criteria .....</b>                   | <b>10</b> |
| 29 | <b>3. ASSESSMENT OF OUTCOME EVALUATION.....</b>         | <b>14</b> |
| 30 | 3.1 OUTCOME EVALUATION.....                             | 14        |
| 31 | 3.1.1 <i>Primary Outcome</i> .....                      | 14        |
| 32 | 3.1.2 <i>Secondary Outcomes</i> .....                   | 14        |
| 33 | 3.2 SAFETY OUTCOMES.....                                | 14        |
| 34 | <b>4. DATA SAFETY MONITORING BOARD (DSMB).....</b>      | <b>16</b> |
| 35 | <b>5. ANALYSIS DATA SET.....</b>                        | <b>17</b> |
| 36 | <b>6. PROCESSING OF MISSING DATA .....</b>              | <b>18</b> |
| 37 | <b>7. STATISTICAL ANALYSIS METHOD.....</b>              | <b>19</b> |
| 38 | 7.1 GENERAL PRINCIPLES OF STATISTICAL ANALYSIS .....    | 19        |
| 39 | 7.2 ANALYSIS PLAN .....                                 | 19        |
| 40 | 7.3 COMPLETION .....                                    | 20        |
| 41 | 7.4 DEMOGRAPHIC DATA AND BASELINE CHARACTERISTICS ..... | 20        |
| 42 | 7.5 EFFICACY ANALYSIS.....                              | 20        |
| 43 | <b>7.5.1 Main Efficacy index.....</b>                   | <b>20</b> |
| 44 | <b>7.5.2 Secodary Efficacy index.....</b>               | <b>21</b> |
| 45 | 7.5.3 <i>Others</i> .....                               | 21        |
| 46 | 7.6 SAFETY ANALYSIS .....                               | 22        |
| 47 | <b>8. STATISTICAL ANALYSIS RESULTS.....</b>             | <b>23</b> |
| 48 | 8.1 DISTRIBUTION OF INCLUDED PATIENTS .....             | 23        |
| 49 | 8.2 DEMOGRAPHIC DATA AND BASELINE CHARACTERISTICS ..... | 26        |
| 50 | 8.3 EFFICACY EVALUATION .....                           | 32        |
| 51 | 8.3.1 <i>Primary efficacy outcome</i> .....             | 32        |
| 52 | <b>8.3.2 Secondary efficacy outcomes.....</b>           | <b>33</b> |

|    |                                  |           |
|----|----------------------------------|-----------|
| 53 | <b>8.4 SAFETY ANALYSIS</b> ..... | <b>42</b> |
| 54 | 8.4.1 ADVERSE EVENTS.....        | 42        |
| 55 |                                  |           |
| 56 |                                  |           |

57

## APPENDIX

58 TABLE 1 POPULATION DISTRIBUTION OF EACH CENTER..... 23

59 TABLE 2 LIST OF PATIENTS NOT INCLUDED IN THE FAS/PPS SET..... 24

60 TABLE 3 DATA SETS OF ENROLLED PATIENTS AND SAFETY AND EFFICACY ANALYSIS SETS.

61 ..... 24

62 TABLE 4 DEMOGRAPHIC DATA ..... 26

63 TABLE 5 BASELINE INFORMATION ..... 26

64 TABLE 6 PAST MEDICAL HISTORY ..... 28

65 TABLE 7 HISTORY OF PREVIOUS AND CURRENT MEDICAL THERAPY FOR

66 CEREBROVASCULAR DISEASES ..... 29

67 TABLE 8 MEDICAL RECORDS OF THE PRESENT ISCHEMIC ATTACK..... 29

68 TABLE 9 INCIDENCE OF PRIMARY OUTCOME (STROKE OR DEATH) 12 MONTHS AFTER

69 RANDOMIZATION ..... 32

70 TABLE 10 INCIDENCE OF DISABLING STROKE OR DEATH WITHIN 36 MONTHS AFTER

71 RANDOMIZATION ..... 33

72 TABLE 11 2-YEAR RATE OF THE SAME-TERRITORY STROKE..... 35

73 TABLE 12 3-YEAR RATE OF THE SAME-TERRITORY STROKE ..... 36

74 TABLE 13 CHANGES OF NEUROLOGICAL FUNCTION EVALUATION (MRS AND NIHSS SCORE)

75 ..... 38

76 TABLE 14 ANY STROKE, SEVERE TIA, CARDIOVASCULAR EVENTS RELATED TO STENTING OR

77 MEDICAL THERAPY WITHIN A FOLLOW-UP OF 3 YEARS ..... 41

78 TABLE 15 SUMMARY OF ADVERSE EVENTS ..... 42

79 TABLE 16 SUMMARY OF THE SEVERITY OF ADVERSE EVENTS..... 43

80

82 **1. Abbreviations**

|        |                                                        |
|--------|--------------------------------------------------------|
| ALT    | Serum alanine aminotransferase                         |
| AST    | Serum glutamic-oxalacetic transaminase                 |
| APTT   | Activated partial thromboplastin time                  |
| BUN    | Urea nitrogen (blood)                                  |
| BMI    | Body mass index                                        |
| CBF    | Cerebral blood flow                                    |
| CBV    | Cerebral blood volume                                  |
| CRF    | Case report form                                       |
| CRO    | Contract Research Organization                         |
| CT     | Computed tomography                                    |
| CTA    | Computed tomography angiography                        |
| CTP    | CT perfusion scan                                      |
| DSA    | Digital subtraction angiography                        |
| DSMB   | Data Safety Monitoring Board                           |
| DWI    | Magnetic resonance diffusion weighted imaging          |
| EC     | Ethics committee                                       |
| ECG    | Electrocardiogram                                      |
| FAS    | Full analysis set                                      |
| FBS    | Fasting plasma glucose                                 |
| HDL-C  | High density lipoprotein cholesterol                   |
| ICF    | Informed consent                                       |
| INR    | International standard ratio                           |
| ITT    | Intention to treat                                     |
| LDL-C  | Low density lipoprotein cholesterol                    |
| LOCF   | The last observation was carried forward               |
| MCA    | Middle cerebral artery                                 |
| MedDRA | Dictionary of medical terms used for drug registration |

|       |                                                       |
|-------|-------------------------------------------------------|
| MRA   | Nuclear magnetic angiography                          |
| mRS   | Modified Rankin Scale                                 |
| MTT   | Mean transit time                                     |
| NIHSS | National Institutes of Health Stroke Assessment Scale |
| PET   | Positron emission tomography                          |
| PPS   | Per-protocol set                                      |
| PT    | Prothrombin time                                      |
| PWI   | Perfusion-weighted imaging                            |
| RCT   | Randomized controlled trial                           |
| SFDA  | State Food and Drug Administration                    |
| TCD   | Transcranial Doppler scan                             |
| TIA   | Transient ischemic attack                             |
| XeCT  | Xenon enhanced computed tomography                    |

83

84

## 85 **2. Protocol Abstract**

### 86 **2.1 Study purpose**

87 Main purpose: to determine whether PTAS (using the Gateway PTA balloon catheter  
88 and Wingspan Stent System, Stryker, Fremont, CA, USA) combined with medical  
89 therapy is superior to medical therapy alone for preventing the primary outcome  
90 (stroke or death within 30 days after enrollment, or stroke in the territory of the  
91 symptomatic intracranial artery between 30 days through 1 year in patients with  
92 recent TIA or non-disabling stroke caused by 70% to 99% stenosis of a major  
93 intracranial artery).

94

95 Secondary purpose: to compare outcomes between groups in terms of:

96 ☞ Disabling stroke or death after enrollment through 3 years in both arms;

97 ☞ 2-year rate of the same-territory stroke;

98 ☞ 3-year rate of the same-territory stroke;

99 ☞ Any stroke, TIA, or cardiovascular events within a follow-up of 3 years;

100 ☞ Death rate in both arms within a follow-up of 3 years;

101 ☞ mRS, NIHSS scores of patients.

102

### 103 **2.2 Study design**

104 This study is a multicenter, randomized, open-label, outcome-blinded trial comparing  
105 medical therapy alone or medical therapy plus stenting with the use of the Wingspan  
106 Stent system in patients with transient ischemic attack (TIA) or non-disabling  
107 ischemic stroke caused by 70%-99% stenosis of a major intracranial artery.

108

### 109 **2.3 Sample size**

110 For symptomatic severe (70-99%) intracranial atherosclerotic stenosis, 1 year of  
111 ipsilateral stroke risk in medical therapy group WASID study was 18%, which was

112 7.3% in a study by the Wingspan stent therapy (Wei-jian Jiang, etc.). At a significance  
113 level of 5% on both sides, the absolute difference of 10.7% (relative risk reduction:  
114 59%), and a power of 80%, within 12 months of follow-up, a total of 302 patients  
115 needs to be evaluated. Assuming a 20% incidence of loss of follow-up and/or  
116 withdrawal, a total of 380 patients, 190 per group, are required to be enrolled in this  
117 study.

118

## 119 **2.4 Blinding and randomization**

120 Complete randomization methodology will be used. Once the patient meets the  
121 inclusion criteria after signing the informed consent form, the researcher will  
122 immediately make a phone call to the research group, and the answering staff will  
123 assign the patient a random number according to the patient number, and the random  
124 number will associate the patient with the corresponding treatment group. Patients  
125 will be given medical therapy alone or Wingspan stent plus medical therapy,  
126 depending on the treatment group randomly assigned. Patients randomly assigned to  
127 the medical treatment group will be discharged after DSA examination.

128 This study is an open, outcome-blinded study.

129

## 130 **2.5 Interventions**

131 Medical therapy:

132 Medical therapy will be identical in both arms and will be similar to the previously  
133 described risk factor management for the SAMMPRIS trial. In brief, aspirin 100 mg  
134 plus clopidogrel 75 mg per day for 90 days (aspirin 100 mg or clopidogrel 75 mg  
135 alone per day thereafter) and management of risk factors. Medical management of  
136 risk factors consists of control of low-density lipoprotein (LDL-C) (target:  
137 LDL-C<2.58mmol/L (100 mg/dL) with statins, and hypertension (systolic pressure  
138 <140 mmHg [<130mmHg in the case of patients with diabetes] and diastolic pressure  
139 <90 mmHg) based on 2014 AHA/ASA guidelines.

140



141 Stenting:

142 Patients randomized to stenting will be scheduled for intervention within three to five  
143 business days. The study protocol requires that the stenting procedure be performed  
144 under general anesthesia by a qualified operator at each site. Intensive management  
145 of risk factors will be applied thereafter.

146

## 147 **2.6 Study population and diagnostic criteria**

148 This trial aims to recruit patients who have had a TIA or ischemic stroke ( $mRS \leq 2$ ) and  
149 advanced ICAS (70%–99% on angiogram). Catheter angiography is required to  
150 confirm 70%–99% stenosis by the WASID criterion for a patient to qualify. Patients  
151 who have an ischemic stroke within the last three weeks will not be included because  
152 of concern for hemorrhagic transformation.

153

### 154 **2.6.1 Inclusion criteria**

155 Detailed inclusion criteria were as follows:

156 1. Eligible patients aged between 30 and 80 years; intracranial arterial stenosis  
157 related to the following non-atherosclerotic factors will be not be considered:  
158 arterial dissection, moya-moya disease; vasculitic disease; herpes zoster,  
159 varicella zoster or other viral vasculopathy; neurosyphilis; any other intracranial  
160 infection; any intracranial stenosis associated with cerebrospinal fluid pleocytosis;  
161 radiation-induced vasculopathy; fibromuscular dysplasia; sickle cell disease;  
162 neurofibromatosis; benign angiopathy of central nervous system; postpartum  
163 angiopathy; suspected vasospastic process, and suspected recanalized  
164 embolus;

165 2. Symptomatic intracranial stenosis: presented with transient ischemic stroke (TIA)  
166 or stroke within the past 12 months attributed to 70%-99% stenosis of a major  
167 intracranial artery (ICA, MCA [M1], vertebral artery, or basilar artery [BA]);

- 168 3. Degree of stenosis: 70%–99%; stenosis degree must be confirmed by catheter  
169 angiography for enrollment in the trial;
- 170 4. Remote infarctions on MRI scan, which can be accounted for by the occlusion of  
171 the terminal cortical branches or hemodynamic compromise (perforator occlusion  
172 excluded). Infarction due to perforators occlusion is defined as basal ganglia or  
173 brainstem/thalamus infarction related with M1 or BA stenosis;
- 174 5. Expected ability to deliver the stent to the lesion;
- 175 6. All the patients should be performed with stenting beyond a duration of three  
176 weeks from the latest ischemic symptom onset;
- 177 7. No recent infarctions identified on MRI (indicated as high signals on DWI series)  
178 upon enrollment;
- 179 8. No massive cerebral infarction (>1/2 MCA territory), intracranial hemorrhage,  
180 epidural or sub-dural hemorrhage, and intracranial brain tumor on CT or MRI  
181 scan;
- 182 9. mRS scale score of  $\leq 2$ ;
- 183 10. Target vessel reference diameter must be measured to be 2.00 mm to 4.50 mm;  
184 target area of stenosis is  $\leq 14$  mm in length;
- 185 11. No childbearing potential or has a negative pregnancy test within the past one  
186 week prior to study procedure; female patients had normal menses in the last 18  
187 months;
- 188 12. Patient is willing and able to return for all follow-up visits required by the protocol;
- 189 13. Patients understand the purpose and requirements of the study and have signed  
190 informed consent form.

191

## 192 **2.6.2 Exclusion criteria**

193 Detailed exclusion criteria were as follows:

- 194 1. Refractory to general anesthesia; not able to be overcome by pre-treatment with  
195 medical therapy
- 196 2. Any condition that precludes proper angiographic assessment
- 197 3. Tandem extracranial or intracranial stenosis (70%–99%) or occlusion that is  
198 proximal or distal to the target intracranial lesion
- 199 4. Bilateral intracranial VA stenosis of 70%–99% and uncertainty about which lesion  
200 is symptomatic (for example, if patient has pon, midbrain, temporal and occipital  
201 symptoms)
- 202 5. Presence of a previously placed intravascular stent or graft in the ipsilateral  
203 distribution within 30 days
- 204 6. Previous treatment of target lesion with a stent, angioplasty, or other mechanical  
205 device, or plan to perform staged angioplasty followed by stenting of target lesion
- 206 7. Severe vascular tortuosity or anatomy that would preclude the safe introduction of  
207 a guiding catheter, guiding sheath or stent placement
- 208 8. Plan to perform concomitant angioplasty or stenting of an extracranial vessel  
209 tandem to an ipsilateral intracranial stenosis
- 210 9. Presence of intraluminal thrombus proximal to or at the target lesion
- 211 10. Any aneurysm proximal to or distal to intracranial stenotic artery
- 212 11. Intracranial tumors or any intracranial vascular malformations
- 213 12. Computed tomographic or angiographic evidence of severe calcification at target  
214 lesion
- 215 13. Thrombolytic therapy within 24 hours before enrollment
- 216 14. Evolving stroke or progressive neurologic signs within 24 hours before enrollment
- 217 15. Stroke of sufficient size (>5 cm on CT or MRI) to place patient at risk of  
218 hemorrhagic transformation during the procedure; hemorrhagic transformation of  
219 an ischemic stroke within the past 15 days

- 
- 220 16. Previous spontaneous intracerebral (parenchymal) or other intracranial  
221 (subarachnoid, subdural, or epidural) hemorrhage within 30 days
- 222 17. Untreated chronic subdural hematoma >5 mm in thickness
- 223 18. Other cardiac sources of emboli such as left ventricular aneurysms, intracardiac  
224 filling defect, cardiomyopathy, aortic or mitral prosthetic heart valve, calcified  
225 aortic stenosis, endocarditis, mitral stenosis, atrial septal defect, atrial septal  
226 aneurysm, left atrial myxoma
- 227 19. Myocardial infarction within previous 30 days
- 228 20. Chronic atrial fibrillation; any episode of paroxysmal atrial fibrillation within the  
229 past six months, or history of paroxysmal atrial fibrillation requiring chronic  
230 anticoagulation
- 231 21. Intolerance or allergic reaction to any of the medical therapy, including aspirin,  
232 clopidogrel, heparin, and local or general anesthetics
- 233 22. History of life-threatening allergy to contrast medium. If not life threatening and  
234 can be effectively pre-treated, patient can be enrolled at physicians' discretion
- 235 23. Recent gastrointestinal bleed that would interfere with antiplatelet therapy
- 236 24. Active bleeding diathesis or coagulopathy; active peptic ulcer disease, major  
237 systemic hemorrhage within 30 days, active bleeding diathesis, platelets count  
238 <125,000, hematocrit <30, Hgb <10 g/dl, uncorrected INR >1.5, bleeding time >1  
239 minute beyond upper limit normal, or heparin-associated thrombocytopenia that  
240 increases the risk of bleeding, uncontrolled severe hypertension (systolic  
241 BP>180mm hg or diastolic BP>115mm hg), severe liver impairment (AST or 25.  
242 ALT >3 times normal, cirrhosis), creatinine >265.2 mmol/l (unless on dialysis).  
243 Major surgery (including open femoral, aortic, or carotid surgery) within previous  
244 30 days or planned in the next 90 days after enrollment
- 245 25. Indication for warfarin or heparin beyond enrollment (exceptions allowed for use  
246 of systemic heparin during stenting procedure or subcutaneous heparin for deep  
247 venous thrombosis prophylaxis while hospitalized)

248 26. Inability to understand and cooperate with study procedures or sign informed  
249 consent

250 27. Severe dementia or psychiatric problems that prevent the patients from following  
251 an outpatient program reliably

252 28. Pregnancy or of childbearing potential and unwilling to use contraception for the  
253 duration of this study

254 29. Actively participating in another drug or device trial that has not completed the  
255 required protocol follow-up period

256

257 **3. Assessment of Outcome evaluation**

258 **3.1 Outcome evaluation**

259 3.1.1 Primary Outcome

260 Stroke or death within 30 days after enrollment or stroke in the territory of qualifying  
261 artery (SIT) beyond 30 days through 1 year.

262

263 3.1.2 Secondary Outcomes

264 ☞ Disabling stroke or death within 3 years after randomization;

265 ☞ 2-year rate of SIT;

266 ☞ 3-year rate of SIT;

267 ☞ Death rate within 3 years;

268 ☞ Any stroke, TIA, or cardiovascular events within 3 years.

269

270 **Note**

271 Stroke is defined as the rapid loss of brain function due to disturbance in the blood  
272 supply to the brain that persists beyond 24 hours. This can be due to ischemia or  
273 hemorrhage.

274

275 TIA is defined as rapidly developed clinical signs of focal or global disturbance of  
276 cerebral function lasting longer than 10 minutes but fewer than 24 hours, with no  
277 apparent nonvascular cause.

278

279 **3.2 Safety outcomes**

280 Investigators should take appropriate treatment for AEs to ensure the safety of  
281 patients and track all AEs/SAEs until they are properly resolved, or the condition is  
282 stable. Additional medical procedures and/or referral to a medical specialist may be

283 required to confirm whether the patients are qualified to continue to participate in the  
284 study.

285

286 **4. Data Safety Monitoring Board (DSMB)**

287 An independent data safety monitoring committee composed of experts in  
288 neurosurgery, internal medicine, neuroradiology, and biostatistics who are not  
289 involved in the study is responsible for the following:

290 1. All potential outcome events including TIA, stroke, and death will be reviewed and  
291 confirmed. Clinical records and imaging results related to any outcomes are required  
292 to be emailed to the outcome committee, and the outcome committee's decision will  
293 be the final decision.

294 2. Efficacy and safety data, as well as balance of patient benefits and risks will be  
295 reviewed regularly. Timely recommendations will be given to the executive committee  
296 on whether to continue, modify, or discontinue the study.

297



298 **5. Analysis data set**

299 Full Analysis Set (FAS): all the subjects who are randomized into groups will be  
300 included, except the subjects who do not meet the inclusion and exclusion criteria and  
301 who are withdrawn immediately after randomization without receiving any intervention  
302 will be excluded. According to the intention-to-treat (ITT) principle, all randomized  
303 patients will be analyzed according to the treatment group assigned to them at the  
304 time of randomization.

305

306 Per-protocol Set (PPS): All patients who are treated according to the study protocol  
307 (the eligibility criteria, the assigned treatment after randomization, additional  
308 medication protocol, the follow-up protocol, and completion of the case report form).

309

310 Safety Analysis Set (SAS): Randomized patients who receive at least one dose of  
311 antiplatelet therapy with a documented safety outcome.

312

313 Efficacy analysis will be carried out based on the FAS and the PPS, and the  
314 conclusions will be made based on the FAS. All baseline demographic data analyses  
315 will be performed on the basis of the FAS and safety assessments will be performed  
316 on the SAS.

317

318 **6. Processing of missing data**

319 For patients who die or are lost to follow-up within 36 months after randomization, the  
320 30-day, 12-month, and 36-month NIHSS and mRS score will be filled using the last  
321 observed value (LOCF) method. For other missing data, no filling or other processing  
322 will be conducted. For survival analysis, missing data will be considered as censored.  
323

## 324 **7. Statistical analysis method**

### 325 **7.1 General principles of statistical analysis**

326 Prior to database locking, the statistician is responsible for developing a statistical  
327 analysis plan in consultation with the principal investigator. SAS 9.4 statistical  
328 software will be used. The efficacy evaluation includes the analysis of PPS and FAS  
329 sets, and the conclusion will be based on the FAS set. SAS set analysis will be used  
330 for safety evaluation.

331

332 All statistical tests will be conducted using a two-sided test, and a p-value of 0.05 or  
333 less will be considered statistically significant (unless otherwise specified).

334 For patients who cross groups, that is, the actual group is not consistent with the  
335 randomly assigned group, efficacy will be analyzed according to the ITT principle  
336 based on the FAS, and safety will be analyzed according to the SAS.

337

### 338 **7.2 Analysis plan**

339 After the study protocol is finalized, the statistician will develop the statistical analysis  
340 plan in consultation with the principal investigator. All the analyses will be performed  
341 with the use of SAS software, version 9.4 (SAS Institute, license number: 11202165).

342

343 Numerical variables will be presented with mean, standard deviation (normally  
344 distributed), or median (interquartile interval). Categorical and hierarchical variables  
345 will be presented with the number of cases and percentages.

346

347 Appropriate method for comparison of baseline between two groups will be adopted  
348 according to the types of variables, and the comparison of numerical variables will be  
349 tested with t-test (normal distribution) or Wilcoxon rank test according to the data  
350 distribution, categorical variables with chi-square test or the exact probability method

351 (if a chi-square test is not applicable), hierarchical data with Wilcoxon rank test or  
352 CMH.

### 353 **7.3 Completion**

354 The number of patients enrolled in each center, the number of patients who complete  
355 the trial and the number of patients withdrawn from the trial will be summarized, and  
356 the list of patients not included in the FAS/PPS set and the reasons for exclusion will  
357 be listed. The number of cases in each group FAS/PPS dataset, the distribution of  
358 cases in each center, and a detailed list of incomplete causes will be listed.

359

### 360 **7.4 Demographic data and baseline characteristics**

361 Baseline data such as patient demographic characteristics (age and gender), vital  
362 signs, past medical history, treatment history and current medical history will be  
363 described, and baseline data such as age, gender and BMI of the two groups will be  
364 compared to measure the comparability of the two groups.

365

### 366 **7.5 Efficacy analysis**

367 FAS and PPS will be used for efficacy analysis.

#### 368 **7.5.1 Main Efficacy index**

369 Stroke or death within 30 days after randomization; And stroke in the territory of  
370 qualifying artery (SIT) beyond 30 days through 12 months after randomization.

371

372 The incidence of stroke or death at 12 months will be compared between the medical  
373 therapy group and the stent group, and a 95% confidence interval will be calculated  
374 for the difference between the two groups. CMH Chi-square test considering  
375 multicenter design will be adopted for inter-group comparison. If the impact of other

376 factors is adjusted, Logistics regression model can be considered for inter-group  
377 comparison.

378

379 The Log Rank test will be used to analyze the primary efficacy outcomes, and the  
380 center information will be stratified as covariates. The Cox proportional risk model will  
381 be used to calculate HR and its 95% confidence interval (CI) to estimate efficacy. The  
382 model included the same covariates as the Log Rank test for fitting. Kaplan-Meier  
383 curves will be plotted by treatment group.

384

385 For comparison of patient demographic characteristics (age, gender), vital signs,  
386 medical history, history of treatment and the medical records of baseline data  
387 between groups, if there are important significant differences for baseline data, the  
388 Cox proportional hazards model will be used for adjustment of these baseline  
389 variables, which will be included as a sensitivity analysis.

390

### 391 **7.5.2 Secodary Efficacy index**

392 Disabling stroke or death after enrollment within 3 years in both arms; 2) 2-year rate  
393 of SIT; 3) 3-year rate of SIT; 4) any stroke, TIA, or cardiovascular events within 3  
394 years; 5) survival rate within 3 years. All above will be analyzed using the same  
395 method as the primary efficacy outcomes. The incidence of each outcome and the  
396 95% confidence interval will be described by groups.

397

### 398 **7.5.3 Others**

399 Mixed effects model will be used to compare the changes of neurological function  
400 indexes between groups. At the same time, the dichotomous variables will be  
401 transformed by selecting clinically significant cut-off points for inter-group  
402 comparison. For mRS, 0-2 versus 3-6 will be used. For NIHSS, an increase of 4  
403 points or more from baseline to 12 months will be considered to have deteriorated  
404 neurological function. CMH Chi-square test considering multicenter design will be

405 adopted for inter-group comparison. If other factors are adjusted, Logistics regression  
406 model can be considered for inter-group comparison.

407 **7.6 Safety analysis**

408 The safety evaluation will be analyzed on the SAS dataset.

409 The number of adverse events of the two groups, as well as the incidence of adverse  
410 events, serious adverse events will be described in tables. The changes of laboratory  
411 and ECG will be described in tables. Procedure-related complications within 30 days  
412 after operation in the stent group will be analyzed. Chi-square test/Fisher exact test  
413 will be used to compare the incidence of adverse events and the incidence of serious  
414 adverse events between the two groups.

415

416 **8. Statistical analysis results**

417 **8.1 Distribution of included patients**

418 Table 1 Population distribution of each center1

|              | FAS        |               |       | PPS        |               |       | SS (Actual Group) |               |       |
|--------------|------------|---------------|-------|------------|---------------|-------|-------------------|---------------|-------|
| Center       | PTAS group | Medical group | Total | PTAS group | Medical group | Total | PTAS group        | Medical group | Total |
| Total number |            |               |       |            |               |       |                   |               |       |

419

420

421

422 Table 2 List of patients not included in the FAS/PPS set2

| Center | Patient ID | Time of enrollment | Reason of exclusion | Included in analysis dataset |     |    |
|--------|------------|--------------------|---------------------|------------------------------|-----|----|
|        |            |                    |                     | PPS                          | FAS | SS |
|        |            |                    |                     |                              |     |    |

423

424 Table 3 Data sets of enrolled patients and safety and efficacy analysis sets.3

|                             | Items                                                                      | PTAS group | Medical group | Total |
|-----------------------------|----------------------------------------------------------------------------|------------|---------------|-------|
| The whole data set          |                                                                            |            |               |       |
|                             | Randomly enrollment                                                        |            |               |       |
| Not included in the FAS set |                                                                            |            |               |       |
|                             | Failure to meet inclusion/exclusion criteria                               |            |               |       |
|                             | Exit after randomization                                                   |            |               |       |
| Suspension during study     |                                                                            |            |               |       |
|                             | Upon requests from subjects or subject's legal authorized representatives. |            |               |       |
|                             | lost of follow-up                                                          |            |               |       |
|                             | Crossover                                                                  |            |               |       |
|                             | Failure to follow the plan                                                 |            |               |       |
|                             | Other                                                                      |            |               |       |
| Safety analysis set         |                                                                            |            |               |       |
|                             | SS (Actual Group)                                                          |            |               |       |
| Efficacy analysis set       |                                                                            |            |               |       |



---

|  |     |  |  |  |
|--|-----|--|--|--|
|  | FAS |  |  |  |
|  | PPS |  |  |  |

---

425

426

427 **8.2 Demographic data and baseline characteristics**

428 Table 4 Demographic data4

| Items       | Indicators    | Total | PTAS group | Medical group | P |
|-------------|---------------|-------|------------|---------------|---|
| Age (years) | Mean (SD)     |       |            |               |   |
| Gender      | Male, n (%)   |       |            |               |   |
|             | Female, n (%) |       |            |               |   |
| Ethnicity   | Han, n (%)    |       |            |               |   |
|             | Other, n (%)  |       |            |               |   |

429

430

431 Table 5 Baseline information5

| Items                              | Indicators | Total | PTAS group | Medical group | P |
|------------------------------------|------------|-------|------------|---------------|---|
| Systolic blood pressure<br>(mmHg)  | Mean (SD)  |       |            |               |   |
| Diastolic blood pressure<br>(mmHg) | Mean (SD)  |       |            |               |   |
| Heart rate (times per<br>minute)   | Mean (SD)  |       |            |               |   |
| BMI (kg/m <sup>2</sup> )           | Mean (SD)  |       |            |               |   |
| Smoking history                    | None n (%) |       |            |               |   |

| Items                                     | Indicators     | Total | PTAS group | Medical group | P |
|-------------------------------------------|----------------|-------|------------|---------------|---|
|                                           | Previous n (%) |       |            |               |   |
|                                           | Current n (%)  |       |            |               |   |
| Alcohol use                               | No n (%)       |       |            |               |   |
|                                           | Previous n (%) |       |            |               |   |
|                                           | Current n (%)  |       |            |               |   |
| Family history of cerebrovascular disease | No n (%)       |       |            |               |   |
|                                           | Yes n (%)      |       |            |               |   |
| Family history of cardiovascular disease  | No n (%)       |       |            |               |   |
|                                           | Yes n (%)      |       |            |               |   |
| High density lipoprotein cholesterol      | Mean (SD)      |       |            |               |   |
| Low density lipoprotein cholesterol       | Mean (SD)      |       |            |               |   |
| Total cholesterol                         | Mean (SD)      |       |            |               |   |
| triglycerides                             | Mean (SD)      |       |            |               |   |
| C-reactive protein                        | Mean (SD)      |       |            |               |   |
| HbA1c                                     | Mean (SD)      |       |            |               |   |

433

 434 Table 6 Past medical history<sup>6</sup>

| Items                           | Indicators | Total | PTAS group | Medical group | P |
|---------------------------------|------------|-------|------------|---------------|---|
| Hypertension                    | No n (%)   |       |            |               |   |
|                                 | Yes n (%)  |       |            |               |   |
| Diabetes                        | No n (%)   |       |            |               |   |
|                                 | Yes n (%)  |       |            |               |   |
| Hyperlipidemia                  | No n (%)   |       |            |               |   |
|                                 | Yes n (%)  |       |            |               |   |
| Coronary heart disease<br>(CHD) | No n (%)   |       |            |               |   |
|                                 | Yes n (%)  |       |            |               |   |
| Myocardial infarction           | No n (%)   |       |            |               |   |
|                                 | Yes n (%)  |       |            |               |   |
| Atrial fibrillation             | No n (%)   |       |            |               |   |
|                                 | Yes n (%)  |       |            |               |   |
| Peripheral vascular disease     | No n (%)   |       |            |               |   |
|                                 | Yes n (%)  |       |            |               |   |
| Alimentary ulcer                | No n (%)   |       |            |               |   |
|                                 | Yes n (%)  |       |            |               |   |

435

436

437 Table 7 History of previous and current medical therapy for cerebrovascular diseases7

| Items                                                    | Indicators | Total | PTAS group | Medical group | P |
|----------------------------------------------------------|------------|-------|------------|---------------|---|
| Antiplatelet agent                                       | No n (%)   |       |            |               |   |
|                                                          | Yes n (%)  |       |            |               |   |
| Anticoagulant drugs                                      | No n (%)   |       |            |               |   |
|                                                          | Yes n (%)  |       |            |               |   |
| History of radiotherapy for cerebrovascular disease      | No n (%)   |       |            |               |   |
|                                                          | Yes n (%)  |       |            |               |   |
| History of surgical treatment of cerebrovascular disease | No n (%)   |       |            |               |   |
|                                                          | Yes n (%)  |       |            |               |   |

438

439

440 Table 8 Medical records of the present ischemic attack.8

| Items | Indicators | Total | PTAS group | Medical group | P |
|-------|------------|-------|------------|---------------|---|
|-------|------------|-------|------------|---------------|---|

| Items                                                      | Indicators                                            | Total | PTAS group | Medical group | P |
|------------------------------------------------------------|-------------------------------------------------------|-------|------------|---------------|---|
| Ischemia-cerebrovascular disease occurred within 12 months | Cerebral infarction n (%)                             |       |            |               |   |
|                                                            | TIA n (%)                                             |       |            |               |   |
| Time from symptom onset to randomization                   | Median (IntQ)                                         |       |            |               |   |
| Artery stenosis                                            | Intracranial segment of internal carotid artery N (%) |       |            |               |   |
|                                                            | Middle cerebral artery N (%)                          |       |            |               |   |
|                                                            | Intracranial segment of vertebral artery N (%)        |       |            |               |   |
|                                                            | Basilar artery N (%)                                  |       |            |               |   |
|                                                            | Others n (%)                                          |       |            |               |   |
| Stenosis degree                                            | Median (IntQ)                                         |       |            |               |   |
|                                                            | 70-79% n (%)                                          |       |            |               |   |
|                                                            | 80-89% n (%)                                          |       |            |               |   |
|                                                            | 90-99% n (%)                                          |       |            |               |   |
| Mori classification                                        | Short of n (%)                                        |       |            |               |   |

| Items       | Indicators          | Total | PTAS group | Medical group | P |
|-------------|---------------------|-------|------------|---------------|---|
|             | Tubular n (%)       |       |            |               |   |
|             | Dispersion of n (%) |       |            |               |   |
| mRS score   | Median (IntQ)       |       |            |               |   |
| NIHSS score | Median (IntQ)       |       |            |               |   |

441

442

443 **8.3 Efficacy evaluation**

444 8.3.1 Primary efficacy outcome

445 Table 9 Incidence of primary outcome (stroke or death) 12 months after randomization9

| Items           | Indicators                            | FAS        |               | PPS        |               |
|-----------------|---------------------------------------|------------|---------------|------------|---------------|
|                 |                                       | PTAS group | Medical group | PTAS group | Medical group |
| Stroke or death | or No n (%)                           |            |               |            |               |
|                 | Yes n (%)                             |            |               |            |               |
|                 | N (Missing)                           |            |               |            |               |
|                 | Difference of inter-group rate 95% CI |            |               |            |               |
|                 | Testing statistic (CMH)               |            |               |            |               |
|                 | P value                               |            |               |            |               |
|                 | Outcome Event (%)                     |            |               |            |               |
|                 | Loss (%)                              |            |               |            |               |
|                 | Incidence                             |            |               |            |               |
|                 | 95%CI                                 |            |               |            |               |
|                 | Log - rank test                       |            |               |            |               |
|                 | P values                              |            |               |            |               |



| Items                                 | Indicators   | FAS        |               | PPS        |               |
|---------------------------------------|--------------|------------|---------------|------------|---------------|
|                                       |              | PTAS group | Medical group | PTAS group | Medical group |
| Cox regression                        | Hazard Ratio |            |               |            |               |
|                                       | 95% CI       |            |               |            |               |
|                                       | P values     |            |               |            |               |
| Cox regression (sensitivity analysis) | Hazard Ratio |            |               |            |               |
|                                       | 95%CI        |            |               |            |               |
|                                       | P values     |            |               |            |               |

446 Note: Cox regression adjusted for variables

447

448 Figure 1 Incidence of primary outcome (stroke or death) within 12 months after randomization (KM curve) (FAS)1

449

450 Figure 2 Incidence of primary end point (stroke or death) within 12 months after randomization (KM curve) (PPS)2

451

452

453 **8.3.2 Secondary efficacy outcomes**

454 Table 10 Incidence of disabling stroke or death within 36 months after randomization10

| Items                     | Indications                          | FAS          |               | PPS        |               |  |
|---------------------------|--------------------------------------|--------------|---------------|------------|---------------|--|
|                           |                                      | PTAS group   | Medical group | PTAS group | Medical group |  |
| Disabling stroke or death | No n (%)                             |              |               |            |               |  |
|                           | Yes n (%)                            |              |               |            |               |  |
|                           | N (Missing)                          |              |               |            |               |  |
|                           | Difference of inter-group rate 95%CI |              |               |            |               |  |
|                           | Test statistics (CMH)                |              |               |            |               |  |
|                           | P values                             |              |               |            |               |  |
|                           | Outcome Event (%)                    |              |               |            |               |  |
|                           | Loss (%)                             |              |               |            |               |  |
|                           | Median event time                    |              |               |            |               |  |
|                           | 95% CI                               |              |               |            |               |  |
|                           | Log - rank test                      |              |               |            |               |  |
|                           | P values                             |              |               |            |               |  |
|                           | Cox regression                       | Hazard Ratio |               |            |               |  |
|                           |                                      | 95%CI        |               |            |               |  |
| P values                  |                                      |              |               |            |               |  |

455 Note: Cox regression adjusted for variables

456

457 Figure 3 Disabling stroke or death within 36 months after randomization (KM curve) (FAS)3

458

459 Figure 4 Disabling stroke or death within 36 months after randomization (KM curve) (PPS)4

460

461

462

463 Table 11 2-year rate of the same-territory stroke11

| Items                 | Indicators                           | FAS        |               | PPS        |               |
|-----------------------|--------------------------------------|------------|---------------|------------|---------------|
|                       |                                      | PTAS group | Medical group | PTAS group | Medical group |
| Same-territory stroke | No n (%)                             |            |               |            |               |
|                       | Yes n (%)                            |            |               |            |               |
|                       | N (Missing)                          |            |               |            |               |
|                       | Difference of inter-group rate 95%CI |            |               |            |               |
|                       | Test statistics (CMH)                |            |               |            |               |
|                       | P values                             |            |               |            |               |
|                       | No n (%)                             |            |               |            |               |
|                       | Outcome Event (%)                    |            |               |            |               |
|                       | Loss (%)                             |            |               |            |               |
|                       | Median event time                    |            |               |            |               |
|                       | 95% CI                               |            |               |            |               |

| Items          | Indications     | FAS        | Medical group | PPS        | Medical group |
|----------------|-----------------|------------|---------------|------------|---------------|
|                |                 | PTAS group |               | PTAS group |               |
|                | Log - rank test |            |               |            |               |
|                | P values        |            |               |            |               |
| Cox regression | Hazard Ratio    |            |               |            |               |
|                | 95%CI           |            |               |            |               |
|                | P values        |            |               |            |               |

464 Note: Cox regression adjusted for variables

465

466 Figure 5 2-year rate of the same-territory stroke (KM curve) (FAS)5

467

468 Figure 6 2-year rate of the same-territory stroke (KM curve) (PPS)6

469

470

471 Table 12 3-year rate of the same-territory stroke 12

| Items                 | Indications | FAS        | Medical group | PPS        | Medical group |
|-----------------------|-------------|------------|---------------|------------|---------------|
|                       |             | PTAS group |               | PTAS group |               |
| Same-territory stroke | No n (%)    |            |               |            |               |
|                       | Yes n (%)   |            |               |            |               |
|                       | N (Missing) |            |               |            |               |

| Items          | Indications                          | FAS        |               | PPS        |               |
|----------------|--------------------------------------|------------|---------------|------------|---------------|
|                |                                      | PTAS group | Medical group | PTAS group | Medical group |
|                | Difference of inter-group rate 95%CI |            |               |            |               |
|                | Test statistics (CMH)                |            |               |            |               |
|                | P values                             |            |               |            |               |
|                | Outcome Event (%)                    |            |               |            |               |
|                | Loss (%)                             |            |               |            |               |
|                | Mortality                            |            |               |            |               |
|                | 95% CI                               |            |               |            |               |
|                | Log - rank test                      |            |               |            |               |
|                | P values                             |            |               |            |               |
| Cox regression | Hazard Ratio                         |            |               |            |               |
|                | 95%CI                                |            |               |            |               |
|                | P values                             |            |               |            |               |

472 Note: Cox regression adjusted for variables

473

474 Figure 7 3-year rate of the same-territory stroke (KM curve) (FAS)7

475

476 Figure 8 3-year rate of the same-territory stroke (KM curve) (PPS)8

477 Table 13 Changes of neurological function evaluation (mRS and NIHSS score)<sup>13</sup>

| Items | Follow-up time                | Indicators             | Total | Experimental group | Control group | P |
|-------|-------------------------------|------------------------|-------|--------------------|---------------|---|
| NIHSS | Baseline                      | Median (IntQ)          |       |                    |               |   |
|       | 1 day after randomization     | Median (IntQ)          |       |                    |               |   |
|       | 7 days after randomization    | Median (IntQ)          |       |                    |               |   |
|       | 1 month after randomization   | Median (IntQ)          |       |                    |               |   |
|       | 12 months after randomization | Median (IntQ)          |       |                    |               |   |
|       | 24 months after randomization | Median (IntQ)          |       |                    |               |   |
|       | 36 months after randomization | Median (IntQ)          |       |                    |               |   |
| NIHSS | 1 day after randomization     | Not deteriorate n (%)  |       |                    |               |   |
|       |                               | Deterioration of n (%) |       |                    |               |   |
|       |                               | P values               |       |                    |               |   |
|       | 7 days after randomization    | Not deteriorate n (%)  |       |                    |               |   |
|       |                               | Deterioration of n (%) |       |                    |               |   |
|       |                               | P values               |       |                    |               |   |
|       | 1 month after randomization   | Not deteriorate n (%)  |       |                    |               |   |
|       |                               | Deterioration of n (%) |       |                    |               |   |
|       |                               | P values               |       |                    |               |   |

| Items | Follow-up time                | Indicators             | Total | Experimental group | Control group | P |
|-------|-------------------------------|------------------------|-------|--------------------|---------------|---|
|       | 12 months after randomization | Not deteriorate n (%)  |       |                    |               |   |
|       |                               | Deterioration of n (%) |       |                    |               |   |
|       |                               | P values               |       |                    |               |   |
|       | 24 months after randomization | Not deteriorate n (%)  |       |                    |               |   |
|       |                               | Deterioration of n (%) |       |                    |               |   |
|       |                               | P values               |       |                    |               |   |
|       | 36 months after randomization | Not deteriorate n (%)  |       |                    |               |   |
|       |                               | Deterioration of n (%) |       |                    |               |   |
|       |                               | P values               |       |                    |               |   |
| mRS   | Baseline                      | Median (IntQ)          |       |                    |               |   |
|       | 7 days after randomization    | Median (IntQ)          |       |                    |               |   |
|       | 1 month after randomization   | Median (IntQ)          |       |                    |               |   |
|       | 12 months after randomization | Median (IntQ)          |       |                    |               |   |
|       | 24 months after randomization | Median (IntQ)          |       |                    |               |   |
|       | 36 months after randomization | Median (IntQ)          |       |                    |               |   |
| mRS   | 7 days after randomization    | 0-2 n (%)              |       |                    |               |   |
|       |                               | 3-6 n (%)              |       |                    |               |   |

| Items | Follow-up time                | Indicators | Total | Experimental group | Control group | P |
|-------|-------------------------------|------------|-------|--------------------|---------------|---|
|       |                               | P values   |       |                    |               |   |
|       | 1 month after randomization   | 0-2 n (%)  |       |                    |               |   |
|       |                               | 3-6 n (%)  |       |                    |               |   |
|       |                               | P values   |       |                    |               |   |
|       | 12 months after randomization | 0-2 n (%)  |       |                    |               |   |
|       |                               | 3-6 n (%)  |       |                    |               |   |
|       |                               | P values   |       |                    |               |   |
|       | 24 months after randomization | 0-2 n (%)  |       |                    |               |   |
|       |                               | 3-6 n (%)  |       |                    |               |   |
|       |                               | P values   |       |                    |               |   |
|       | 36 months after randomization | 0-2 n (%)  |       |                    |               |   |
|       |                               | 3-6 n (%)  |       |                    |               |   |
|       |                               | P values   |       |                    |               |   |

478

479



480 Table 14 any stroke, severe TIA, cardiovascular events related to stenting or medical therapy within a follow-up of 3 years<sup>14</sup>

| Items           | Indicators                | FAS        |               | PPS        |               |
|-----------------|---------------------------|------------|---------------|------------|---------------|
|                 |                           | PTAS group | Medical group | PTAS group | Medical group |
| Any stroke,     | No n (%)                  |            |               |            |               |
| severe TIA,     | Yes n (%)                 |            |               |            |               |
| cardiovascular  | N (Missing)               |            |               |            |               |
| events related  | Difference of inter-group |            |               |            |               |
| to stenting or  | rate 95%CI                |            |               |            |               |
| medical therapy | Test Statistics (CMH)     |            |               |            |               |
|                 | P values                  |            |               |            |               |
|                 | No n (%)                  |            |               |            |               |
|                 | Outcome Event (%)         |            |               |            |               |
|                 | Loss (%)                  |            |               |            |               |
|                 | Median event time         |            |               |            |               |
|                 | 95% CI                    |            |               |            |               |
|                 | Log - rank test           |            |               |            |               |
|                 | P values                  |            |               |            |               |
| Cox regression  | Hazard Ratio              |            |               |            |               |
|                 | 95%CI                     |            |               |            |               |
|                 | P values                  |            |               |            |               |

481 Note: Cox regression adjusted for variables

482

483 **8.4 Safety analysis**

484 **8.4.1 Adverse events**

485 Table 15 Summary of adverse events<sup>15</sup>

| Items                                                | PTAS group |       |            | Medical group |       |            | P values |
|------------------------------------------------------|------------|-------|------------|---------------|-------|------------|----------|
|                                                      | cases      | total | percentage | cases         | total | percentage |          |
| Adverse events                                       |            |       |            |               |       |            |          |
| Adverse events related to interventions              |            |       |            |               |       |            |          |
| Serious Adverse Events                               |            |       |            |               |       |            |          |
| Serious adverse events associated with interventions |            |       |            |               |       |            |          |
| Adverse events leading to shedding                   |            |       |            |               |       |            |          |

486 Note: Adverse reactions associated with experimental drugs are defined as likely, likely, and definitely related.

487

488

489

490 Table 16 Summary of the severity of adverse events16

| Items                   | PTAS group |       |            | Medical group |       |            | P values |
|-------------------------|------------|-------|------------|---------------|-------|------------|----------|
|                         | cases      | total | percentage | cases         | total | percentage |          |
| Mild Adverse Events     |            |       |            |               |       |            |          |
| Moderate Adverse Events |            |       |            |               |       |            |          |
| Major Adverse Events    |            |       |            |               |       |            |          |

491

492

493 **China Angioplasty & Stenting for Symptomatic Intracranial Severe**  
494 **Stenosis (CASSISS)**

495  
496 **A prospective multi-center, randomized controlled trial (RCT)**

497

# 498 **Statistical Analysis**

# 499 **Plan**

499

500

501

**Ver. 2.0**

502

**Version date: December 19, 2020**

503

|                       |                                                   |
|-----------------------|---------------------------------------------------|
| Type of research:     | Investigator-initiated<br>Phase IV clinical trial |
| Organizer:            | Xuanwu Hospital<br>Capital Medical University     |
| Statistical analysis: | Clinical Research Institute<br>Peking University  |

504

505 **Author:** \_\_\_\_\_

506 **Date:** \_\_\_\_\_

507 **Haibo Wang**

508 **Clinical Research Institute of Peking University**

509

510

## CONTENTS

|     |                                                         |           |
|-----|---------------------------------------------------------|-----------|
| 511 | <b>1. ABBREVIATIONS .....</b>                           | <b>5</b>  |
| 512 | <b>2. PROTOCOL ABSTRACT.....</b>                        | <b>7</b>  |
| 513 | 2.1 STUDY PURPOSE .....                                 | 7         |
| 514 | 2.2 STUDY DESIGN.....                                   | 7         |
| 515 | 2.3 SAMPLE SIZE .....                                   | 7         |
| 516 | 2.4 BLINDING AND RANDOMIZATION .....                    | 8         |
| 517 | 2.5 INTERVENTIONS .....                                 | 8         |
| 518 | 2.6 STUDY POPULATION AND DIAGNOSTIC CRITERIA.....       | 9         |
| 519 | <b>2.6.1 Inclusion criteria.....</b>                    | <b>9</b>  |
| 520 | <b>2.6.2 Exclusion criteria .....</b>                   | <b>10</b> |
| 521 | <b>3. ASSESSMENT OF OUTCOME EVALUATION.....</b>         | <b>14</b> |
| 522 | 3.1 OUTCOME EVALUATION.....                             | 14        |
| 523 | 3.1.1 <i>Primary Outcome</i> .....                      | 14        |
| 524 | 3.1.2 <i>Secondary Outcomes</i> .....                   | 14        |
| 525 | 3.2 SAFETY OUTCOMES.....                                | 14        |
| 526 | <b>4. DATA SAFETY MONITORING BOARD (DSMB).....</b>      | <b>16</b> |
| 527 | <b>5. ANALYSIS DATA SET.....</b>                        | <b>17</b> |
| 528 | <b>6. PROCESSING OF MISSING DATA .....</b>              | <b>18</b> |
| 529 | <b>7. STATISTICAL ANALYSIS METHOD.....</b>              | <b>19</b> |
| 530 | 7.1 GENERAL PRINCIPLES OF STATISTICAL ANALYSIS .....    | 19        |
| 531 | 7.2 ANALYSIS PLAN .....                                 | 19        |
| 532 | 7.3 COMPLETION .....                                    | 20        |
| 533 | 7.4 DEMOGRAPHIC DATA AND BASELINE CHARACTERISTICS ..... | 20        |
| 534 | 7.5 EFFICACY ANALYSIS.....                              | 20        |
| 535 | <b>7.5.1 Main Efficacy index.....</b>                   | <b>20</b> |
| 536 | <b>7.5.2 Secodary Efficacy index.....</b>               | <b>21</b> |
| 537 | 7.5.3 <i>Others</i> .....                               | 21        |
| 538 | 7.6 SAFETY ANALYSIS .....                               | 22        |
| 539 | <b>8. STATISTICAL ANALYSIS RESULTS .....</b>            | <b>23</b> |
| 540 | 8.1 DISTRIBUTION OF INCLUDED PATIENTS .....             | 23        |
| 541 | 8.2 DEMOGRAPHIC DATA AND BASELINE CHARACTERISTICS ..... | 26        |
| 542 | 8.3 EFFICACY EVALUATION .....                           | 32        |
| 543 | 8.3.1 <i>Primary efficacy outcome</i> .....             | 32        |
| 544 | <b>8.3.2 Secondary efficacy outcomes.....</b>           | <b>33</b> |

|     |                                  |           |
|-----|----------------------------------|-----------|
| 545 | <b>8.4 SAFETY ANALYSIS</b> ..... | <b>39</b> |
| 546 | 8.4.1 ADVERSE EVENTS.....        | 39        |
| 547 |                                  |           |
| 548 |                                  |           |

549

**APPENDIX**

|     |                                                                               |    |
|-----|-------------------------------------------------------------------------------|----|
| 550 | TABLE 1 POPULATION DISTRIBUTION OF EACH CENTER.....                           | 23 |
| 551 | TABLE 2 LIST OF PATIENTS NOT INCLUDED IN THE FAS/PPS SET.....                 | 24 |
| 552 | TABLE 3 DATA SETS OF ENROLLED PATIENTS AND SAFETY AND EFFICACY ANALYSIS SETS. |    |
| 553 | .....                                                                         | 24 |
| 554 | TABLE 4 DEMOGRAPHIC DATA .....                                                | 26 |
| 555 | TABLE 5 BASELINE INFORMATION .....                                            | 26 |
| 556 | TABLE 6 PAST MEDICAL HISTORY .....                                            | 28 |
| 557 | TABLE 7 HISTORY OF PREVIOUS AND CURRENT MEDICAL THERAPY FOR                   |    |
| 558 | CEREBROVASCULAR DISEASES .....                                                | 29 |
| 559 | TABLE 8 MEDICAL RECORDS OF THE PRESENT ISCHEMIC ATTACK.....                   | 29 |
| 560 | TABLE 9 INCIDENCE OF PRIMARY OUTCOME (STROKE OR DEATH) 12 MONTHS AFTER        |    |
| 561 | RANDOMIZATION .....                                                           | 32 |
| 562 | TABLE 10 INCIDENCE OF DISABLING STROKE OR DEATH WITHIN 36 MONTHS AFTER        |    |
| 563 | RANDOMIZATION .....                                                           | 33 |
| 564 | TABLE 11 2-YEAR RATE OF THE SAME-TERRITORY STROKE.....                        | 35 |
| 565 | TABLE 12 3-YEAR RATE OF THE SAME-TERRITORY STROKE .....                       | 36 |
| 566 | TABLE 13 ANY STROKE, SEVERE TIA, CARDIOVASCULAR EVENTS RELATED TO STENTING OR |    |
| 567 | MEDICAL THERAPY WITHIN A FOLLOW-UP OF 3 YEARS .....                           | 38 |
| 568 | TABLE 14 SUMMARY OF ADVERSE EVENTS .....                                      | 39 |
| 569 | TABLE 15 SUMMARY OF THE SEVERITY OF ADVERSE EVENTS.....                       | 40 |
| 570 |                                                                               |    |

572 **1. Abbreviations**

|        |                                                        |
|--------|--------------------------------------------------------|
| ALT    | Serum alanine aminotransferase                         |
| AST    | Serum glutamic-oxalacetic transaminase                 |
| APTT   | Activated partial thromboplastin time                  |
| BUN    | Urea nitrogen (blood)                                  |
| BMI    | Body mass index                                        |
| CBF    | Cerebral blood flow                                    |
| CBV    | Cerebral blood volume                                  |
| CRF    | Case report form                                       |
| CRO    | Contract Research Organization                         |
| CT     | Computed tomography                                    |
| CTA    | Computed tomography angiography                        |
| CTP    | CT perfusion scan                                      |
| DSA    | Digital subtraction angiography                        |
| DSMB   | Data Safety Monitoring Board                           |
| DWI    | Magnetic resonance diffusion weighted imaging          |
| EC     | Ethics committee                                       |
| ECG    | Electrocardiogram                                      |
| FAS    | Full analysis set                                      |
| FBS    | Fasting plasma glucose                                 |
| HDL-C  | High density lipoprotein cholesterol                   |
| ICF    | Informed consent                                       |
| INR    | International standard ratio                           |
| ITT    | Intention to treat                                     |
| LDL-C  | Low density lipoprotein cholesterol                    |
| LOCF   | The last observation was carried forward               |
| MCA    | Middle cerebral artery                                 |
| MedDRA | Dictionary of medical terms used for drug registration |



|       |                                                       |
|-------|-------------------------------------------------------|
| MRA   | Nuclear magnetic angiography                          |
| mRS   | Modified Rankin Scale                                 |
| MTT   | Mean transit time                                     |
| NIHSS | National Institutes of Health Stroke Assessment Scale |
| PET   | Positron emission tomography                          |
| PPS   | Per-protocol set                                      |
| PT    | Prothrombin time                                      |
| PWI   | Perfusion-weighted imaging                            |
| RCT   | Randomized controlled trial                           |
| SFDA  | State Food and Drug Administration                    |
| TCD   | Transcranial Doppler scan                             |
| TIA   | Transient ischemic attack                             |
| XeCT  | Xenon enhanced computed tomography                    |

573

574

## 575 **2. Protocol Abstract**

### 576 **2.1 Study purpose**

577 Main purpose: to determine whether PTAS (using the Gateway PTA balloon catheter  
578 and Wingspan Stent System, Stryker, Fremont, CA, USA) combined with medical  
579 therapy is superior to medical therapy alone for preventing the primary outcome  
580 (stroke or death within 30 days after enrollment, or stroke in the territory of the  
581 symptomatic intracranial artery between 30 days through 1 year in patients with  
582 recent TIA or non-disabling stroke caused by 70% to 99% stenosis of a major  
583 intracranial artery).

584

585 Secondary purpose: to compare outcomes between groups in terms of:

- 586 ☞ Disabling stroke or death after enrollment through 3 years in both arms;
- 587 ☞ 2-year rate of the same-territory stroke;
- 588 ☞ 3-year rate of the same-territory stroke;
- 589 ☞ Any stroke, TIA, or cardiovascular events within a follow-up of 3 years;
- 590 ☞ Death rate in both arms within a follow-up of 3 years.

591

### 592 **2.2 Study design**

593 This study is a multicenter, randomized, open-label, outcome-blinded trial comparing  
594 medical therapy alone or medical therapy plus stenting with the use of the Wingspan  
595 Stent system in patients with transient ischemic attack (TIA) or non-disabling  
596 ischemic stroke caused by 70%-99% stenosis of a major intracranial artery.

597

### 598 **2.3 Sample size**

599 For symptomatic severe (70-99%) intracranial atherosclerotic stenosis, 1 year of  
600 ipsilateral stroke risk in medical therapy group WASID study was 18%, which was  
601 7.3% in a study by the Wingspan stent therapy (Wei-jian Jiang, etc.). At a significance

602 level of 5% on both sides, the absolute difference of 10.7% (relative risk reduction:  
603 59%), and a power of 80%, within 12 months of follow-up, a total of 302 patients  
604 needs to be evaluated. Assuming a 20% incidence of loss of follow-up and/or  
605 withdrawal, a total of 380 patients, 190 per group, are required to be enrolled in this  
606 study.

607

## 608 **2.4 Blinding and randomization**

609 Complete randomization methodology will be used. Once the patient meets the  
610 inclusion criteria after signing the informed consent form, the researcher will  
611 immediately make a phone call to the research group, and the answering staff will  
612 assign the patient a random number according to the patient number, and the random  
613 number will associate the patient with the corresponding treatment group. Patients  
614 will be given medical therapy alone or Wingspan stent plus medical therapy,  
615 depending on the treatment group randomly assigned. Patients randomly assigned to  
616 the medical treatment group will be discharged after DSA examination.

617 This study is an open, outcome-blinded study.

618

## 619 **2.5 Interventions**

620 Medical therapy:

621 Medical therapy will be identical in both arms and will be similar to the previously  
622 described risk factor management for the SAMMPRIS trial. In brief, aspirin 100 mg  
623 plus clopidogrel 75 mg per day for 90 days (aspirin 100 mg or clopidogrel 75 mg  
624 alone per day thereafter) and management of risk factors. Medical management of  
625 risk factors consists of control of low-density lipoprotein (LDL-C) (target:  
626 LDL-C<2.58mmol/L (100 mg/dL) with statins, and hypertension (systolic pressure  
627 <140 mmHg [ $<130$ mmHg in the case of patients with diabetes] and diastolic pressure  
628 <90 mmHg) based on 2014 AHA/ASA guidelines.

629

630 Stenting:

631 Patients randomized to stenting will be scheduled for intervention within three to five  
632 business days. The study protocol requires that the stenting procedure be performed  
633 under general anesthesia by a qualified operator at each site. Intensive management  
634 of risk factors will be applied thereafter.

635

## 636 **2.6 Study population and diagnostic criteria**

637 This trial aims to recruit patients who have had a TIA or ischemic stroke ( $mRS \leq 2$ ) and  
638 advanced ICAS (70%–99% on angiogram). Catheter angiography is required to  
639 confirm 70%–99% stenosis by the WASID criterion for a patient to qualify. Patients  
640 who have an ischemic stroke within the last three weeks will not be included because  
641 of concern for hemorrhagic transformation.

642

### 643 **2.6.1 Inclusion criteria**

644 Detailed inclusion criteria were as follows:

645 14. Eligible patients aged between 30 and 80 years; intracranial arterial stenosis  
646 related to the following non-atherosclerotic factors will be not be considered:  
647 arterial dissection, moya-moya disease; vasculitic disease; herpes zoster,  
648 varicella zoster or other viral vasculopathy; neurosyphilis; any other intracranial  
649 infection; any intracranial stenosis associated with cerebrospinal fluid pleocytosis;  
650 radiation-induced vasculopathy; fibromuscular dysplasia; sickle cell disease;  
651 neurofibromatosis; benign angiopathy of central nervous system; postpartum  
652 angiopathy; suspected vasospastic process, and suspected recanalized  
653 embolus;

654 15. Symptomatic intracranial stenosis: presented with transient ischemic stroke (TIA)  
655 or stroke within the past 12 months attributed to 70%-99% stenosis of a major  
656 intracranial artery (ICA, MCA [M1], vertebral artery, or basilar artery [BA]);

- 657 16. Degree of stenosis: 70%–99%; stenosis degree must be confirmed by catheter  
658 angiography for enrollment in the trial;
- 659 17. Remote infarctions on MRI scan, which can be accounted for by the occlusion of  
660 the terminal cortical branches or hemodynamic compromise (perforator occlusion  
661 excluded). Infarction due to perforators occlusion is defined as basal ganglia or  
662 brainstem/thalamus infarction related with M1 or BA stenosis;
- 663 18. Expected ability to deliver the stent to the lesion;
- 664 19. All the patients should be performed with stenting beyond a duration of three  
665 weeks from the latest ischemic symptom onset;
- 666 20. No recent infarctions identified on MRI (indicated as high signals on DWI series)  
667 upon enrollment;
- 668 21. No massive cerebral infarction (>1/2 MCA territory), intracranial hemorrhage,  
669 epidural or sub-dural hemorrhage, and intracranial brain tumor on CT or MRI  
670 scan;
- 671 22. mRS scale score of  $\leq 2$ ;
- 672 23. Target vessel reference diameter must be measured to be 2.00 mm to 4.50 mm;  
673 target area of stenosis is  $\leq 14$  mm in length;
- 674 24. No childbearing potential or has a negative pregnancy test within the past one  
675 week prior to study procedure; female patients had normal menses in the last 18  
676 months;
- 677 25. Patient is willing and able to return for all follow-up visits required by the protocol;
- 678 26. Patients understand the purpose and requirements of the study and have signed  
679 informed consent form.

680

### 681 **2.6.2 Exclusion criteria**

682 Detailed exclusion criteria were as follows:

- 
- 683 30. Refractory to general anesthesia; not able to be overcome by pre-treatment with  
684 medical therapy
- 685 31. Any condition that precludes proper angiographic assessment
- 686 32. Tandem extracranial or intracranial stenosis (70%–99%) or occlusion that is  
687 proximal or distal to the target intracranial lesion
- 688 33. Bilateral intracranial VA stenosis of 70%–99% and uncertainty about which lesion  
689 is symptomatic (for example, if patient has pon, midbrain, temporal and occipital  
690 symptoms)
- 691 34. Presence of a previously placed intravascular stent or graft in the ipsilateral  
692 distribution within 30 days
- 693 35. Previous treatment of target lesion with a stent, angioplasty, or other mechanical  
694 device, or plan to perform staged angioplasty followed by stenting of target lesion
- 695 36. Severe vascular tortuosity or anatomy that would preclude the safe introduction of  
696 a guiding catheter, guiding sheath or stent placement
- 697 37. Plan to perform concomitant angioplasty or stenting of an extracranial vessel  
698 tandem to an ipsilateral intracranial stenosis
- 699 38. Presence of intraluminal thrombus proximal to or at the target lesion
- 700 39. Any aneurysm proximal to or distal to intracranial stenotic artery
- 701 40. Intracranial tumors or any intracranial vascular malformations
- 702 41. Computed tomographic or angiographic evidence of severe calcification at target  
703 lesion
- 704 42. Thrombolytic therapy within 24 hours before enrollment
- 705 43. Evolving stroke or progressive neurologic signs within 24 hours before enrollment
- 706 44. Stroke of sufficient size (>5 cm on CT or MRI) to place patient at risk of  
707 hemorrhagic transformation during the procedure; hemorrhagic transformation of  
708 an ischemic stroke within the past 15 days

- 709 45. Previous spontaneous intracerebral (parenchymal) or other intracranial  
710 (subarachnoid, subdural, or epidural) hemorrhage within 30 days
- 711 46. Untreated chronic subdural hematoma >5 mm in thickness
- 712 47. Other cardiac sources of emboli such as left ventricular aneurysms, intracardiac  
713 filling defect, cardiomyopathy, aortic or mitral prosthetic heart valve, calcified  
714 aortic stenosis, endocarditis, mitral stenosis, atrial septal defect, atrial septal  
715 aneurysm, left atrial myxoma
- 716 48. Myocardial infarction within previous 30 days
- 717 49. Chronic atrial fibrillation; any episode of paroxysmal atrial fibrillation within the  
718 past six months, or history of paroxysmal atrial fibrillation requiring chronic  
719 anticoagulation
- 720 50. Intolerance or allergic reaction to any of the medical therapy, including aspirin,  
721 clopidogrel, heparin, and local or general anesthetics
- 722 51. History of life-threatening allergy to contrast medium. If not life threatening and  
723 can be effectively pre-treated, patient can be enrolled at physicians' discretion
- 724 52. Recent gastrointestinal bleed that would interfere with antiplatelet therapy
- 725 53. Active bleeding diathesis or coagulopathy; active peptic ulcer disease, major  
726 systemic hemorrhage within 30 days, active bleeding diathesis, platelets count  
727 <125,000, hematocrit <30, Hgb <10 g/dl, uncorrected INR >1.5, bleeding time >1  
728 minute beyond upper limit normal, or heparin-associated thrombocytopenia that  
729 increases the risk of bleeding, uncontrolled severe hypertension (systolic  
730 BP>180mm hg or diastolic BP>115mm hg), severe liver impairment (AST or 25.  
731 ALT >3 times normal, cirrhosis), creatinine >265.2 mmol/l (unless on dialysis).  
732 Major surgery (including open femoral, aortic, or carotid surgery) within previous  
733 30 days or planned in the next 90 days after enrollment
- 734 54. Indication for warfarin or heparin beyond enrollment (exceptions allowed for use  
735 of systemic heparin during stenting procedure or subcutaneous heparin for deep  
736 venous thrombosis prophylaxis while hospitalized)

737 55. Inability to understand and cooperate with study procedures or sign informed  
738 consent

739 56. Severe dementia or psychiatric problems that prevent the patients from following  
740 an outpatient program reliably

741 57. Pregnancy or of childbearing potential and unwilling to use contraception for the  
742 duration of this study

743 58. Actively participating in another drug or device trial that has not completed the  
744 required protocol follow-up period

745



746 **3. Assessment of Outcome evaluation**

747 **3.1 Outcome evaluation**

748 3.1.1 Primary Outcome

749 Stroke or death within 30 days after enrollment or stroke in the territory of qualifying  
750 artery (SIT) beyond 30 days through 1 year.

751

752 3.1.2 Secondary Outcomes

753 ☞ Disabling stroke or death within 3 years after randomization;

754 ☞ 2-year rate of SIT;

755 ☞ 3-year rate of SIT;

756 ☞ Death rate within 3 years;

757 ☞ Any stroke, TIA, or cardiovascular events within 3 years.

758

759 **Note**

760 Stroke is defined as the rapid loss of brain function due to disturbance in the blood  
761 supply to the brain that persists beyond 24 hours. This can be due to ischemia or  
762 hemorrhage.

763

764 TIA is defined as rapidly developed clinical signs of focal or global disturbance of  
765 cerebral function lasting longer than 10 minutes but fewer than 24 hours, with no  
766 apparent nonvascular cause.

767

768 **3.2 Safety outcomes**

769 Investigators should take appropriate treatment for AEs to ensure the safety of  
770 patients and track all AEs/SAEs until they are properly resolved, or the condition is  
771 stable. Additional medical procedures and/or referral to a medical specialist may be

772 required to confirm whether the patients are qualified to continue to participate in the  
773 study.

774

775 **4. Data Safety Monitoring Board (DSMB)**

776 An independent data safety monitoring committee composed of experts in  
777 neurosurgery, internal medicine, neuroradiology, and biostatistics who are not  
778 involved in the study is responsible for the following:

779 1. All potential outcome events including TIA, stroke, and death will be reviewed and  
780 confirmed. Clinical records and imaging results related to any outcomes are required  
781 to be emailed to the outcome committee, and the outcome committee's decision will  
782 be the final decision.

783 2. Efficacy and safety data, as well as balance of patient benefits and risks will be  
784 reviewed regularly. Timely recommendations will be given to the executive committee  
785 on whether to continue, modify, or discontinue the study.

786

## 787 **5. Analysis data set**

788 Full Analysis Set (FAS): all the subjects who are randomized into groups will be  
789 included, except the subjects who do not meet the inclusion and exclusion criteria and  
790 who are withdrawn immediately after randomization without receiving any intervention  
791 will be excluded. According to the intention-to-treat (ITT) principle, all randomized  
792 patients will be analyzed according to the treatment group assigned to them at the  
793 time of randomization.

794

795 Per-protocol Set (PPS): All patients who are treated according to the study protocol  
796 (the eligibility criteria, the assigned treatment after randomization, additional  
797 medication protocol, the follow-up protocol, and completion of the case report form).

798

799 Safety Analysis Set (SAS): Randomized patients who receive at least one dose of  
800 antiplatelet therapy with a documented safety outcome.

801

802 Efficacy analysis will be carried out based on the FAS and the PPS, and the  
803 conclusions will be made based on the FAS. All baseline demographic data analyses  
804 will be performed on the basis of the FAS and safety assessments will be performed  
805 on the SAS.

806

807 **6. Processing of missing data**

808 For patients who die or are lost to follow-up within 36 months after randomization, the  
809 30-day, 12-month, and 36-month NIHSS and mRS score will be filled using the last  
810 observed value (LOCF) method. For other missing data, no filling or other processing  
811 will be conducted. For survival analysis, missing data will be considered as censored.  
812

## 813 **7. Statistical analysis method**

### 814 **7.1 General principles of statistical analysis**

815 Prior to database locking, the statistician is responsible for developing a statistical  
816 analysis plan in consultation with the principal investigator. SAS 9.4 statistical  
817 software will be used. The efficacy evaluation includes the analysis of PPS and FAS  
818 sets, and the conclusion will be based on the FAS set. SAS set analysis will be used  
819 for safety evaluation.

820

821 All statistical tests will be conducted using a two-sided test, and a p-value of 0.05 or  
822 less will be considered statistically significant (unless otherwise specified).

823 For patients who cross groups, that is, the actual group is not consistent with the  
824 randomly assigned group, efficacy will be analyzed according to the ITT principle  
825 based on the FAS, and safety will be analyzed according to the SAS.

826

### 827 **7.2 Analysis plan**

828 After the study protocol is finalized, the statistician will develop the statistical analysis  
829 plan in consultation with the principal investigator. All the analyses will be performed  
830 with the use of SAS software, version 9.4 (SAS Institute, license number: 11202165).

831

832 Numerical variables will be presented with mean, standard deviation (normally  
833 distributed), or median (interquartile interval). Categorical and hierarchical variables  
834 will be presented with the number of cases and percentages.

835

836 Appropriate method for comparison of baseline between two groups will be adopted  
837 according to the types of variables, and the comparison of numerical variables will be  
838 tested with t-test (normal distribution) or Wilcoxon rank test according to the data  
839 distribution, categorical variables with chi-square test or the exact probability method

840 (if a chi-square test is not applicable), hierarchical data with Wilcoxon rank test or  
841 CMH.

### 842 **7.3 Completion**

843 The number of patients enrolled in each center, the number of patients who complete  
844 the trial and the number of patients withdrawn from the trial will be summarized, and  
845 the list of patients not included in the FAS/PPS set and the reasons for exclusion will  
846 be listed. The number of cases in each group FAS/PPS dataset, the distribution of  
847 cases in each center, and a detailed list of incomplete causes will be listed.

848

### 849 **7.4 Demographic data and baseline characteristics**

850 Baseline data such as patient demographic characteristics (age and gender), vital  
851 signs, past medical history, treatment history and current medical history will be  
852 described, and baseline data such as age, gender and BMI of the two groups will be  
853 compared to measure the comparability of the two groups.

854

### 855 **7.5 Efficacy analysis**

856 FAS and PPS will be used for efficacy analysis.

#### 857 **7.5.1 Main Efficacy index**

858 Stroke or death within 30 days after randomization; And stroke in the territory of  
859 qualifying artery (SIT) beyond 30 days through 12 months after randomization.

860

861 The incidence of stroke or death at 12 months will be compared between the medical  
862 therapy group and the stent group, and a 95% confidence interval will be calculated  
863 for the difference between the two groups. CMH Chi-square test considering  
864 multicenter design will be adopted for inter-group comparison. If the impact of other

865 factors is adjusted, Logistics regression model can be considered for inter-group  
866 comparison.

867

868 The Log Rank test will be used to analyze the primary efficacy outcomes, and the  
869 center information will be stratified as covariates. The Cox proportional risk model will  
870 be used to calculate HR and its 95% confidence interval (CI) to estimate efficacy. The  
871 model included the same covariates as the Log Rank test for fitting. Kaplan-Meier  
872 curves will be plotted by treatment group.

873

874 For comparison of patient demographic characteristics (age, gender), vital signs,  
875 medical history, history of treatment and the medical records of baseline data  
876 between groups, if there are important significant differences for baseline data, the  
877 Cox proportional hazards model will be used for adjustment of these baseline  
878 variables, which will be included as a sensitivity analysis.

879

#### 880 **7.5.2 Secodary Efficacy index**

881 Disabling stroke or death after enrollment within 3 years in both arms; 2) 2-year rate  
882 of SIT; 3) 3-year rate of SIT; 4) any stroke, TIA, or cardiovascular events within 3  
883 years; 5) survival rate within 3 years. All above will be analyzed using the same  
884 method as the primary efficacy outcomes. The incidence of each outcome and the  
885 95% confidence interval will be described by groups.

886

#### 887 **7.5.3 Others**

888 At the same time, the dichotomous variables will be transformed by selecting clinically  
889 significant cut-off points for inter-group comparison. CMH Chi-square test considering  
890 multicenter design will be adopted for inter-group comparison. If other factors are  
891 adjusted, Logistics regression model can be considered for inter-group comparison.

892



893 **7.6 Safety analysis**

894 The safety evaluation will be analyzed on the SAS dataset.

895 The number of adverse events of the two groups, as well as the incidence of adverse  
896 events, serious adverse events will be described in tables. The changes of laboratory  
897 and ECG will be described in tables. Procedure-related complications within 30 days  
898 after operation in the stent group will be analyzed. Chi-square test/Fisher exact test  
899 will be used to compare the incidence of adverse events and the incidence of serious  
900 adverse events between the two groups.

901

902 **8. Statistical analysis results**

903 **8.1 Distribution of included patients**

904 Table 1 Population distribution of each center17

|              | FAS        |               |       | PPS        |               |       | SS (Actual Group) |               |       |
|--------------|------------|---------------|-------|------------|---------------|-------|-------------------|---------------|-------|
| Center       | PTAS group | Medical group | Total | PTAS group | Medical group | Total | PTAS group        | Medical group | Total |
| Total number |            |               |       |            |               |       |                   |               |       |

905

906

907

908 Table 2 List of patients not included in the FAS/PPS set18

|        |            |                    |                     | Included in analysis dataset |     |    |
|--------|------------|--------------------|---------------------|------------------------------|-----|----|
| Center | Patient ID | Time of enrollment | Reason of exclusion | PPS                          | FAS | SS |
|        |            |                    |                     |                              |     |    |

909

910 Table 3 Data sets of enrolled patients and safety and efficacy analysis sets.19

|                             | Items                                                                      | PTAS group | Medical group | Total |
|-----------------------------|----------------------------------------------------------------------------|------------|---------------|-------|
| The whole data set          |                                                                            |            |               |       |
|                             | Randomly enrollment                                                        |            |               |       |
| Not included in the FAS set |                                                                            |            |               |       |
|                             | Failure to meet inclusion/exclusion criteria                               |            |               |       |
|                             | Exit after randomization                                                   |            |               |       |
| Suspension during study     |                                                                            |            |               |       |
|                             | Upon requests from subjects or subject's legal authorized representatives. |            |               |       |
|                             | lost of follow-up                                                          |            |               |       |
|                             | Crossover                                                                  |            |               |       |
|                             | Failure to follow the plan                                                 |            |               |       |
|                             | Other                                                                      |            |               |       |
| Safety analysis set         |                                                                            |            |               |       |
|                             | SS (Actual Group)                                                          |            |               |       |
| Efficacy analysis set       |                                                                            |            |               |       |

---

|  |     |  |  |  |
|--|-----|--|--|--|
|  | FAS |  |  |  |
|  | PPS |  |  |  |

---

911

912

913 **8.2 Demographic data and baseline characteristics**

914 Table 4 Demographic data<sup>20</sup>

| Items       | Indicators    | Total | PTAS group | Medical group | P |
|-------------|---------------|-------|------------|---------------|---|
| Age (years) | Mean (SD)     |       |            |               |   |
| Gender      | Male, n (%)   |       |            |               |   |
|             | Female, n (%) |       |            |               |   |
| Ethnicity   | Han, n (%)    |       |            |               |   |
|             | Other, n (%)  |       |            |               |   |

915

916

917 Table 5 Baseline information<sup>21</sup>

| Items                           | Indicators | Total | PTAS group | Medical group | P |
|---------------------------------|------------|-------|------------|---------------|---|
| Systolic blood pressure (mmHg)  | Mean (SD)  |       |            |               |   |
| Diastolic blood pressure (mmHg) | Mean (SD)  |       |            |               |   |
| Heart rate (times per minute)   | Mean (SD)  |       |            |               |   |
| BMI (kg/m <sup>2</sup> )        | Mean (SD)  |       |            |               |   |
| Smoking history                 | None n (%) |       |            |               |   |

| Items                                     | Indicators     | Total | PTAS group | Medical group | P |
|-------------------------------------------|----------------|-------|------------|---------------|---|
|                                           | Previous n (%) |       |            |               |   |
|                                           | Current n (%)  |       |            |               |   |
| Alcohol use                               | No n (%)       |       |            |               |   |
|                                           | Previous n (%) |       |            |               |   |
|                                           | Current n (%)  |       |            |               |   |
| Family history of cerebrovascular disease | No n (%)       |       |            |               |   |
|                                           | Yes n (%)      |       |            |               |   |
| Family history of cardiovascular disease  | No n (%)       |       |            |               |   |
|                                           | Yes n (%)      |       |            |               |   |
| High density lipoprotein cholesterol      | Mean (SD)      |       |            |               |   |
| Low density lipoprotein cholesterol       | Mean (SD)      |       |            |               |   |
| Total cholesterol                         | Mean (SD)      |       |            |               |   |
| triglycerides                             | Mean (SD)      |       |            |               |   |
| C-reactive protein                        | Mean (SD)      |       |            |               |   |
| HbA1c                                     | Mean (SD)      |       |            |               |   |

919

 920 Table 6 Past medical history<sup>22</sup>

| Items                           | Indicators | Total | PTAS group | Medical group | P |
|---------------------------------|------------|-------|------------|---------------|---|
| Hypertension                    | No n (%)   |       |            |               |   |
|                                 | Yes n (%)  |       |            |               |   |
| Diabetes                        | No n (%)   |       |            |               |   |
|                                 | Yes n (%)  |       |            |               |   |
| Hyperlipidemia                  | No n (%)   |       |            |               |   |
|                                 | Yes n (%)  |       |            |               |   |
| Coronary heart disease<br>(CHD) | No n (%)   |       |            |               |   |
|                                 | Yes n (%)  |       |            |               |   |
| Myocardial infarction           | No n (%)   |       |            |               |   |
|                                 | Yes n (%)  |       |            |               |   |
| Atrial fibrillation             | No n (%)   |       |            |               |   |
|                                 | Yes n (%)  |       |            |               |   |
| Peripheral vascular disease     | No n (%)   |       |            |               |   |
|                                 | Yes n (%)  |       |            |               |   |
| Alimentary ulcer                | No n (%)   |       |            |               |   |
|                                 | Yes n (%)  |       |            |               |   |

921

922

 923 Table 7 History of previous and current medical therapy for cerebrovascular diseases<sup>23</sup>

| Items                                                    | Indicators | Total | PTAS group | Medical group | P |
|----------------------------------------------------------|------------|-------|------------|---------------|---|
| Antiplatelet agent                                       | No n (%)   |       |            |               |   |
|                                                          | Yes n (%)  |       |            |               |   |
| Anticoagulant drugs                                      | No n (%)   |       |            |               |   |
|                                                          | Yes n (%)  |       |            |               |   |
| History of radiotherapy for cerebrovascular disease      | No n (%)   |       |            |               |   |
|                                                          | Yes n (%)  |       |            |               |   |
| History of surgical treatment of cerebrovascular disease | No n (%)   |       |            |               |   |
|                                                          | Yes n (%)  |       |            |               |   |

924

925

 926 Table 8 Medical records of the present ischemic attack.<sup>24</sup>

| Items | Indicators | Total | PTAS group | Medical group | P |
|-------|------------|-------|------------|---------------|---|
|-------|------------|-------|------------|---------------|---|



| Items                                                      | Indicators                                            | Total | PTAS group | Medical group | P |
|------------------------------------------------------------|-------------------------------------------------------|-------|------------|---------------|---|
| Ischemia-cerebrovascular disease occurred within 12 months | Cerebral infarction n (%)                             |       |            |               |   |
|                                                            | TIA n (%)                                             |       |            |               |   |
| Time from symptom onset to randomization                   | Median (IntQ)                                         |       |            |               |   |
| Artery stenosis                                            | Intracranial segment of internal carotid artery N (%) |       |            |               |   |
|                                                            | Middle cerebral artery N (%)                          |       |            |               |   |
|                                                            | Intracranial segment of vertebral artery N (%)        |       |            |               |   |
|                                                            | Basilar artery N (%)                                  |       |            |               |   |
|                                                            | Others n (%)                                          |       |            |               |   |
| Stenosis degree                                            | Median (IntQ)                                         |       |            |               |   |
|                                                            | 70-79% n (%)                                          |       |            |               |   |
|                                                            | 80-89% n (%)                                          |       |            |               |   |
|                                                            | 90-99% n (%)                                          |       |            |               |   |
| Mori classification                                        | Short of n (%)                                        |       |            |               |   |

| Items       | Indications         | Total | PTAS group | Medical group | P |
|-------------|---------------------|-------|------------|---------------|---|
|             | Tubular n (%)       |       |            |               |   |
|             | Dispersion of n (%) |       |            |               |   |
| mRS score   | Median (IntQ)       |       |            |               |   |
| NIHSS score | Median (IntQ)       |       |            |               |   |

927

928

929 **8.3 Efficacy evaluation**

930 8.3.1 Primary efficacy outcome

931 Table 9 Incidence of primary outcome (stroke or death) 12 months after randomization<sup>25</sup>

| Items           | Indicators                            | FAS        |               | PPS        |               |
|-----------------|---------------------------------------|------------|---------------|------------|---------------|
|                 |                                       | PTAS group | Medical group | PTAS group | Medical group |
| Stroke or death | or No n (%)                           |            |               |            |               |
|                 | Yes n (%)                             |            |               |            |               |
|                 | N (Missing)                           |            |               |            |               |
|                 | Difference of inter-group rate 95% CI |            |               |            |               |
|                 | Testing statistic (CMH)               |            |               |            |               |
|                 | P value                               |            |               |            |               |
|                 | Outcome Event (%)                     |            |               |            |               |
|                 | Loss (%)                              |            |               |            |               |
|                 | Incidence                             |            |               |            |               |
|                 | 95%CI                                 |            |               |            |               |
|                 | Log - rank test                       |            |               |            |               |
|                 | P values                              |            |               |            |               |

| Items                                 | Indicators   | FAS        |               | PPS        |               |
|---------------------------------------|--------------|------------|---------------|------------|---------------|
|                                       |              | PTAS group | Medical group | PTAS group | Medical group |
| Cox regression                        | Hazard Ratio |            |               |            |               |
|                                       | 95% CI       |            |               |            |               |
|                                       | P values     |            |               |            |               |
| Cox regression (sensitivity analysis) | Hazard Ratio |            |               |            |               |
|                                       | 95%CI        |            |               |            |               |
|                                       | P values     |            |               |            |               |

932 Note: Cox regression adjusted for variables

933

934 Figure 1 Incidence of primary outcome (stroke or death) within 12 months after randomization (KM curve) (FAS)9

935

936 Figure 2 Incidence of primary end point (stroke or death) within 12 months after randomization (KM curve) (PPS)10

937

938

939 **8.3.2 Secondary efficacy outcomes**

940 Table 10 Incidence of disabling stroke or death within 36 months after randomization26

| Items                        | Indications                             | FAS          |               | PPS        |               |  |
|------------------------------|-----------------------------------------|--------------|---------------|------------|---------------|--|
|                              |                                         | PTAS group   | Medical group | PTAS group | Medical group |  |
| Disabling<br>stroke<br>death | No n (%)                                |              |               |            |               |  |
|                              | or Yes n (%)                            |              |               |            |               |  |
|                              | N (Missing)                             |              |               |            |               |  |
|                              | Difference of inter-group<br>rate 95%CI |              |               |            |               |  |
|                              | Test statistics (CMH)                   |              |               |            |               |  |
|                              | P values                                |              |               |            |               |  |
|                              | Outcome Event (%)                       |              |               |            |               |  |
|                              | Loss (%)                                |              |               |            |               |  |
|                              | Median event time                       |              |               |            |               |  |
|                              | 95% CI                                  |              |               |            |               |  |
|                              | Log - rank test                         |              |               |            |               |  |
|                              | P values                                |              |               |            |               |  |
|                              | Cox<br>regression                       | Hazard Ratio |               |            |               |  |
|                              |                                         | 95%CI        |               |            |               |  |
|                              | P values                                |              |               |            |               |  |

941 Note: Cox regression adjusted for variables

942

943 Figure 3 Disabling stroke or death within 36 months after randomization (KM curve) (FAS)11

944

945 Figure 4 Disabling stroke or death within 36 months after randomization (KM curve) (PPS)12

946

947

948

949 Table 11 2-year rate of the same-territory stroke27

| Items                 | Indicators                           | FAS        |               | PPS        |               |
|-----------------------|--------------------------------------|------------|---------------|------------|---------------|
|                       |                                      | PTAS group | Medical group | PTAS group | Medical group |
| Same-territory stroke | No n (%)                             |            |               |            |               |
|                       | Yes n (%)                            |            |               |            |               |
|                       | N (Missing)                          |            |               |            |               |
|                       | Difference of inter-group rate 95%CI |            |               |            |               |
|                       | Test statistics (CMH)                |            |               |            |               |
|                       | P values                             |            |               |            |               |
|                       | No n (%)                             |            |               |            |               |
|                       | Outcome Event (%)                    |            |               |            |               |
|                       | Loss (%)                             |            |               |            |               |
|                       | Median event time                    |            |               |            |               |
|                       | 95% CI                               |            |               |            |               |

| Items          | Indications     | FAS        | Medical group | PPS        | Medical group |
|----------------|-----------------|------------|---------------|------------|---------------|
|                |                 | PTAS group |               | PTAS group |               |
|                | Log - rank test |            |               |            |               |
|                | P values        |            |               |            |               |
| Cox regression | Hazard Ratio    |            |               |            |               |
|                | 95%CI           |            |               |            |               |
|                | P values        |            |               |            |               |

950 Note: Cox regression adjusted for variables

951

952 Figure 5 2-year rate of the same-territory stroke (KM curve) (FAS)13

953

954 Figure 6 2-year rate of the same-territory stroke (KM curve) (PPS)14

955

956

957 Table 12 3-year rate of the same-territory stroke 28

| Items                 | Indications | FAS        | Medical group | PPS        | Medical group |
|-----------------------|-------------|------------|---------------|------------|---------------|
|                       |             | PTAS group |               | PTAS group |               |
| Same-territory stroke | No n (%)    |            |               |            |               |
|                       | Yes n (%)   |            |               |            |               |
|                       | N (Missing) |            |               |            |               |

| Items          | Indications                          | FAS        |               | PPS        |               |
|----------------|--------------------------------------|------------|---------------|------------|---------------|
|                |                                      | PTAS group | Medical group | PTAS group | Medical group |
|                | Difference of inter-group rate 95%CI |            |               |            |               |
|                | Test statistics (CMH)                |            |               |            |               |
|                | P values                             |            |               |            |               |
|                | Outcome Event (%)                    |            |               |            |               |
|                | Loss (%)                             |            |               |            |               |
|                | Mortality                            |            |               |            |               |
|                | 95% CI                               |            |               |            |               |
|                | Log - rank test                      |            |               |            |               |
|                | P values                             |            |               |            |               |
| Cox regression | Hazard Ratio                         |            |               |            |               |
|                | 95%CI                                |            |               |            |               |
|                | P values                             |            |               |            |               |

958 Note: Cox regression adjusted for variables

959

960 Figure 7 3-year rate of the same-territory stroke (KM curve) (FAS)15

961

962 Figure 8 3-year rate of the same-territory stroke (KM curve) (PPS)16



963  
 964 Table 13 any stroke, severe TIA, cardiovascular events related to stenting or medical therapy within a follow-up of 3 years<sup>29</sup>

| Items                                                                                                  | Indicators                 | FAS        |               | PPS        |               |
|--------------------------------------------------------------------------------------------------------|----------------------------|------------|---------------|------------|---------------|
|                                                                                                        |                            | PTAS group | Medical group | PTAS group | Medical group |
| Any stroke,<br>severe TIA,<br>cardiovascular<br>events related<br>to stenting or<br>medical<br>therapy | No n (%)                   |            |               |            |               |
|                                                                                                        | Yes n (%)                  |            |               |            |               |
|                                                                                                        | cardiovascular N (Missing) |            |               |            |               |
|                                                                                                        | Difference of inter-group  |            |               |            |               |
|                                                                                                        | rate 95%CI                 |            |               |            |               |
|                                                                                                        | Test Statistics (CMH)      |            |               |            |               |
|                                                                                                        | P values                   |            |               |            |               |
|                                                                                                        | No n (%)                   |            |               |            |               |
|                                                                                                        | Outcome Event (%)          |            |               |            |               |
|                                                                                                        | Loss (%)                   |            |               |            |               |
|                                                                                                        | Median event time          |            |               |            |               |
|                                                                                                        | 95% CI                     |            |               |            |               |
|                                                                                                        | Log - rank test            |            |               |            |               |
| P values                                                                                               |                            |            |               |            |               |
| Cox<br>regression                                                                                      | Hazard Ratio               |            |               |            |               |
|                                                                                                        | 95%CI                      |            |               |            |               |

| Items    | Indications | FAS        |               | PPS        |               |
|----------|-------------|------------|---------------|------------|---------------|
|          |             | PTAS group | Medical group | PTAS group | Medical group |
| P values |             |            |               |            |               |

965 Note: Cox regression adjusted for variables

966

## 967 8.4 Safety analysis

### 968 8.4.1 Adverse events

969 Table 14 Summary of adverse events<sup>30</sup>

| Items                                                | PTAS group |       |            | Medical group |       |            | P values |
|------------------------------------------------------|------------|-------|------------|---------------|-------|------------|----------|
|                                                      | cases      | total | percentage | cases         | total | percentage |          |
| Adverse events                                       |            |       |            |               |       |            |          |
| Adverse events related to interventions              |            |       |            |               |       |            |          |
| Serious Adverse Events                               |            |       |            |               |       |            |          |
| Serious adverse events associated with interventions |            |       |            |               |       |            |          |
| Adverse events leading to shedding                   |            |       |            |               |       |            |          |

970 Note: Adverse reactions associated with experimental drugs are defined as likely, likely, and definitely related.

971

972 Table 15 Summary of the severity of adverse events<sup>31</sup>

| Items                   | PTAS group |       |            | Medical group |       |            | P values |
|-------------------------|------------|-------|------------|---------------|-------|------------|----------|
|                         | cases      | total | percentage | cases         | total | percentage |          |
| Mild Adverse Events     |            |       |            |               |       |            |          |
| Moderate Adverse Events |            |       |            |               |       |            |          |
| Major Adverse Events    |            |       |            |               |       |            |          |

973

974

975

976

## CASSISS Study

977

### Statistical Analysis Plan (SAP):

978

### Summary of Changes (Ver.1.0 ⇒ Ver.2.0)

979

#### CASSISS Study: China Angioplasty & Stenting for Symptomatic Intracranial Severe Stenosis

980

Prepared: Dec 19, 2020

| # | Page  | Item                         | Description of change(s)                                                                                                                                                                                                                                                                                                                                |                                                                                                                                                                                                                                                                                                               | Reasons for change        |
|---|-------|------------------------------|---------------------------------------------------------------------------------------------------------------------------------------------------------------------------------------------------------------------------------------------------------------------------------------------------------------------------------------------------------|---------------------------------------------------------------------------------------------------------------------------------------------------------------------------------------------------------------------------------------------------------------------------------------------------------------|---------------------------|
|   |       |                              | Before change (Ver. 1.0 Date prepared: May 10, 2015)                                                                                                                                                                                                                                                                                                    | After change (Ver. 2.0 Date prepared: Dec 19, 2020)                                                                                                                                                                                                                                                           |                           |
| 1 | 14    | 3.1.2<br>Secondary Endpoints | <ul style="list-style-type: none"> <li>• Disabling stroke or death within 3 years after randomization;</li> <li>• 2-year rate of SIT;</li> <li>• 3-year rate of SIT;</li> <li>• Any stroke, TIA, or cardiovascular events related to therapy within 3 years;</li> <li>• Death rate within 3 years;</li> <li>• mRS, NIHSS scores of patients.</li> </ul> | <ul style="list-style-type: none"> <li>• Disabling stroke or death within 3 years after randomization;</li> <li>• 2-year rate of SIT;</li> <li>• 3-year rate of SIT;</li> <li>• Any stroke, TIA, or cardiovascular events related to therapy within 3 years;</li> <li>• Death rate within 3 years;</li> </ul> | Due to protocol revisions |
| 2 | 20-22 | 7.5                          | (3) <b><u>Mixed effects model will be used to</u></b>                                                                                                                                                                                                                                                                                                   | At the same time, the dichotomous variables                                                                                                                                                                                                                                                                   | Due to                    |

|  |  |                                                                                                                                                                                                                                                                                                                                                                                                                                                                                                                                                                                                                                                                          |                                                                                                                                                                                                                                                                                                                  |                      |
|--|--|--------------------------------------------------------------------------------------------------------------------------------------------------------------------------------------------------------------------------------------------------------------------------------------------------------------------------------------------------------------------------------------------------------------------------------------------------------------------------------------------------------------------------------------------------------------------------------------------------------------------------------------------------------------------------|------------------------------------------------------------------------------------------------------------------------------------------------------------------------------------------------------------------------------------------------------------------------------------------------------------------|----------------------|
|  |  | <p>Efficacy analysis</p> <p><b><u>compare the changes of neurological function indexes between groups.</u></b> At the same time, the dichotomous variables will be transformed by selecting clinically significant cut-off points for inter-group comparison. <b><u>For mRS, 0-2 versus 3-6 will be used. For NIHSS, an increase of 4 points or more from baseline to 12 months will be considered to have deteriorated neurological function.</u></b></p> <p>CMH Chi-square test considering multicenter design will be adopted for inter-group comparison. If other factors are adjusted, Logistics regression model can be considered for inter-group comparison.</p> | <p>will be transformed by selecting clinically significant cut-off points for inter-group comparison. CMH Chi-square test considering multicenter design will be adopted for inter-group comparison. If other factors are adjusted, Logistics regression model can be considered for inter-group comparison.</p> | <p>revision No.1</p> |
|--|--|--------------------------------------------------------------------------------------------------------------------------------------------------------------------------------------------------------------------------------------------------------------------------------------------------------------------------------------------------------------------------------------------------------------------------------------------------------------------------------------------------------------------------------------------------------------------------------------------------------------------------------------------------------------------------|------------------------------------------------------------------------------------------------------------------------------------------------------------------------------------------------------------------------------------------------------------------------------------------------------------------|----------------------|

---

|   |    |          |                                                                            |                 |                      |
|---|----|----------|----------------------------------------------------------------------------|-----------------|----------------------|
| 3 | 38 | Table 13 | Table 13 Changes of neurological function evaluation (mRS and NIHSS score) | Omit this table | Due to revision No.1 |
|---|----|----------|----------------------------------------------------------------------------|-----------------|----------------------|

981

982
