# Supplementary material
Source: PubMed Central journal article supplement (PMC9364128)
Supplement: jama-e2212000-s004.pdf [file jama-e2212000-s004.pdf]

\*First name, last name, and suffix (if applicable) are required and will appear in PubMed.

| <b>*Group Name(s): CASSISS Trial Investigators</b> |                   |                              |                  |                                                                                                                                                                                                                           |                                          |                                                                  |                                                                                            |
|----------------------------------------------------|-------------------|------------------------------|------------------|---------------------------------------------------------------------------------------------------------------------------------------------------------------------------------------------------------------------------|------------------------------------------|------------------------------------------------------------------|--------------------------------------------------------------------------------------------|
| <b>*First Name and Middle Initial(s)</b>           | <b>*Last Name</b> | <b>*Suffix (eg, Jr, III)</b> | Academic Degrees | Institution                                                                                                                                                                                                               | Location (city, state/province, country) | Role or Contribution, eg, chair, principal investigator          | Group (if more than 1 Group listed in the byline) and/or Subgroup (eg, Steering Committee) |
| Liqun                                              | Jiao              |                              | MD               | Departments of Neurosurgery and Interventional Neuroradiology, Xuanwu Hospital, China International Neuroscience Institute, Capital Medical University, China National Clinical Research Center for Neurological Diseases | Beijing, China                           | Chair                                                            | Executive and Steering Committee                                                           |
| Daming                                             | Wang              |                              | MD               | Department of Neurosurgery, Beijing Hospital                                                                                                                                                                              | Beijing, China                           | Co-principal investigator                                        | Executive and Steering Committee                                                           |
| Timo                                               | Krings            |                              | MD               | Department of Medical Imaging, Toronto Western Hospital, University of Toronto                                                                                                                                            | ON, Canada                               | Manuscript revision                                              | Executive and Steering Committee                                                           |
| David S                                            | Libeskind         |                              | MD               | Department of Neurology and Comprehensive Stroke Center, David Geffen School of Medicine, University of California Los Angeles                                                                                            | Los Angeles, CA, USA                     | Manuscript revision                                              | Executive and Steering Committee                                                           |
| Huaizhang                                          | Shi               |                              | MD               | Department of Neurosurgery, the 1st Affiliated Hospital of Harbin Medical University                                                                                                                                      | Harbin, Heilongjiang Province, China     | Patients recruitment, data collection and manuscript preparation | Executive and Steering Committee                                                           |
| Tianxiao                                           | Li                |                              | MD               | Department of Intervention, Henan Provincial People's Hospital                                                                                                                                                            | Zhengzhou, Henan Province, China         | Patients recruitment, data collection and manuscript preparation | Executive and Steering Committee                                                           |

## Supplemental Online Content: Nonauthor Collaborators

\*First name, last name, and suffix (if applicable) are required and will appear in PubMed.

| *First Name and Middle Initial(s) | *Last Name | *Suffix (eg, Jr, III) | Academic Degrees | Institution                                                                             | Location (city, state/province, country) | Role or Contribution, eg, chair, principal investigator          | Group (if more than 1 Group listed in the byline) and/or Subgroup (eg, Steering Committee) |
|-----------------------------------|------------|-----------------------|------------------|-----------------------------------------------------------------------------------------|------------------------------------------|------------------------------------------------------------------|--------------------------------------------------------------------------------------------|
| Zhenwei                           | Zhao       |                       | MD               | Department of Neurosurgery, Tangdu Hospital of Air Force Medical University             | Xi'an, Shaanxi Province, China           | Patients recruitment, data collection and manuscript preparation | Executive and Steering Committee                                                           |
| Wei                               | Wu         |                       | MD               | Department of Neurology, Qilu Hospital of Shandong University                           | Ji'nan, Shandong Province, China         | Patients recruitment, data collection and manuscript preparation | Executive and Steering Committee                                                           |
| Yiling                            | Cai        |                       | MD               | Department of Neurology, PLA Strategic Support Force Characteristic Medical Center      | Beijing, China                           | Patients recruitment, data collection and manuscript preparation | Executive and Steering Committee                                                           |
| Weiwen                            | He         |                       | MD               | Department of Neurosurgery, the 2nd affiliated Hospital of Guangzhou Medical University | Guangzhou, Guangdong Province, China     | Patients recruitment, data collection and manuscript preparation | Executive and Steering Committee                                                           |
| Shengping                         | Huang      |                       | MD               | Department of Neurosurgery, Guangdong Provincial Hospital of Chinese Medicine           | Guangzhou, Guangdong Province, China     | Patients recruitment, data collection and manuscript preparation | Executive and Steering Committee                                                           |
| Long                              | Yin        |                       | MD               | Department of Neurosurgery, Tianjin Huanhu Hospital                                     | Tianjin, China                           | Patients recruitment, data collection and manuscript preparation | Executive and Steering Committee                                                           |

## Supplemental Online Content: Nonauthor Collaborators

\*First name, last name, and suffix (if applicable) are required and will appear in PubMed.

| *First Name and Middle Initial(s) | *Last Name | *Suffix (eg, Jr, III) | Academic Degrees | Institution                                                                                                                                                                            | Location (city, state/province, country) | Role or Contribution, eg, chair, principal investigator          | Group (if more than 1 Group listed in the byline) and/or Subgroup (eg, Steering Committee) |
|-----------------------------------|------------|-----------------------|------------------|----------------------------------------------------------------------------------------------------------------------------------------------------------------------------------------|------------------------------------------|------------------------------------------------------------------|--------------------------------------------------------------------------------------------|
| Yuxiang                           | Gu         |                       | MD               | Department of Neurosurgery, Huashan Hospital of Fudan University                                                                                                                       | Shanghai, China                          | Patients recruitment, data collection and manuscript preparation | Executive and Steering Committee                                                           |
| Hongqi                            | Zhang      |                       | MD               | Department of Neurosurgery, Xuanwu Hospital, China International Neuroscience Institute, Capital Medical University, China National Clinical Research Center for Neurological Diseases | Beijing, China                           | Clinical advisory                                                | Advisory Board                                                                             |
| Feng                              | Ling       |                       | MD               | Department of Neurosurgery, Xuanwu Hospital, China International Neuroscience Institute, Capital Medical University, China National Clinical Research Center for Neurological Diseases | Beijing, China                           | Clinical advisory                                                | Advisory Board                                                                             |
| Louis R.                          | Caplan     |                       | MD               | Beth Israel Deaconess Medical Center (BIDMC), Department of Neurology, Beth Israel Deaconess HealthCare - Chestnut Hill, Harvard University                                            | Boston, MA, USA                          | Clinical advisory                                                | Advisory Board                                                                             |

## Supplemental Online Content: Nonauthor Collaborators

\*First name, last name, and suffix (if applicable) are required and will appear in PubMed.

| *First Name and Middle Initial(s) | *Last Name | *Suffix (eg, Jr, III) | Academic Degrees | Institution                                                                                                                                                                                             | Location (city, state/province, country) | Role or Contribution, eg, chair, principal investigator | Group (if more than 1 Group listed in the byline) and/or Subgroup (eg, Steering Committee) |
|-----------------------------------|------------|-----------------------|------------------|---------------------------------------------------------------------------------------------------------------------------------------------------------------------------------------------------------|------------------------------------------|---------------------------------------------------------|--------------------------------------------------------------------------------------------|
| Osama                             | Zaidat     |                       | MD               | North East Medical (NeoMed) University, Neuroscience & Stroke Director, Neurology Residency and Endovascular Fellowship Director, Bon Secours Mercy Health Neuroscience Institute, St. Vincent Hospital | Toledo, Oh, USA                          | Clinical advisory                                       | Advisory Board                                                                             |
| Simon Chun Ho                     | YU         |                       | MD               | Department of Imaging & Interventional Radiology, Faculty of Medicine, the Chinese University of Hong Kong                                                                                              | Hongkong, China                          | Clinical advisory                                       | Advisory Board                                                                             |
| Qinjian                           | Sun        |                       | MD               | Department of Neurology, Shandong Provincial Hospital, Shandong First Medical University and Shandong Academy of Medical Sciences                                                                       | Ji'nan, Shandong Province, China         | Data and safety monitoring                              | Data and Safety Monitoring Board (DSMB)                                                    |
| Jie                               | Lu         |                       | MD               | Department of Radiology, Xuanwu Hospital, Capital Medical University                                                                                                                                    | Beijing, China                           | Data and safety monitoring                              | Data and Safety Monitoring Board (DSMB)                                                    |
| Yuhai                             | Bao        |                       | MD               | Department of Neurosurgery, Xuanwu Hospital, China International Neuroscience Institute, Capital Medical University, China National Clinical Research Center for Neurological Diseases                  | Beijing, China                           | Data and safety monitoring                              | Data and Safety Monitoring Board (DSMB)                                                    |

## Supplemental Online Content: Nonauthor Collaborators

\*First name, last name, and suffix (if applicable) are required and will appear in PubMed.

| *First Name and Middle Initial(s) | *Last Name | *Suffix (eg, Jr, III) | Academic Degrees | Institution                                                                                                                                                                                             | Location (city, state/province, country) | Role or Contribution, eg, chair, principal investigator | Group (if more than 1 Group listed in the byline) and/or Subgroup (eg, Steering Committee) |
|-----------------------------------|------------|-----------------------|------------------|---------------------------------------------------------------------------------------------------------------------------------------------------------------------------------------------------------|------------------------------------------|---------------------------------------------------------|--------------------------------------------------------------------------------------------|
| Kun                               | Yang       |                       | MS               | Department of Evidence-based Medicine, Xuanwu Hospital, Capital Medical University                                                                                                                      | Beijing, China                           | Data and safety monitoring                              | Data and Safety Monitoring Board (DSMB)                                                    |
| Haiqing                           | Song       |                       | MD               | Department of Neurology, Xuanwu Hospital, Capital Medical University                                                                                                                                    | Beijing, China                           | Outcome decision                                        | Outcome Committee                                                                          |
| Wenhuo                            | Chen       |                       | MD               | Department of Neurology, Zhangzhou Municipal Hospital of Fujian Province                                                                                                                                | Zhangzhou, Fujian Province, China        | Outcome decision                                        | Outcome Committee                                                                          |
| Haitao                            | Chi        |                       | MD               | Department of Neurology, Dalian University Affiliated Xinhua Hospital                                                                                                                                   | Dalian, Liaoning Province, China         | Outcome decision                                        | Outcome Committee                                                                          |
| Shouchun                          | Wang       |                       | MD               | Department of Neurology, the First Hospital of Jilin University                                                                                                                                         | Changchun, Jilin Province, China         | Outcome decision                                        | Outcome Committee                                                                          |
| Jin                               | Zhang      |                       | MD               | Department of Neurology, the First Hospital of Shanxi Medical University                                                                                                                                | Taiyuan, Shanxi Province, China          | Adverse events assessment                               | Adverse Committee                                                                          |
| Fei                               | Chen       |                       | MD               | Department of Neurology, Xuanwu Hospital, Capital Medical University                                                                                                                                    | Beijing, China                           | Adverse events assessment                               | Adverse Committee                                                                          |
| Shenmao                           | Li         |                       | MD               | Department of Interventional Neuroradiology, Xuanwu Hospital, China International Neuroscience Institute, Capital Medical University, China National Clinical Research Center for Neurological Diseases | Beijing, China                           | Imaging assessment                                      | Imaging Core-lab                                                                           |
| Xiaobo                            | Zhang      |                       | MD               | Department of Intervention, Peking Union Medical College                                                                                                                                                | Beijing, China                           | Imaging assessment                                      | Imaging Core-lab                                                                           |

Supplemental Online Content: Nonauthor Collaborators

\*First name, last name, and suffix (if applicable) are required and will appear in PubMed.

| <b>*First Name and Middle Initial(s)</b> | <b>*Last Name</b> | <b>*Suffix (eg, Jr, III)</b> | Academic Degrees | Institution                                                                                                                                                                                                               | Location (city, state/province, country) | Role or Contribution, eg, chair, principal investigator | Group (if more than 1 Group listed in the byline) and/or Subgroup (eg, Steering Committee) |
|------------------------------------------|-------------------|------------------------------|------------------|---------------------------------------------------------------------------------------------------------------------------------------------------------------------------------------------------------------------------|------------------------------------------|---------------------------------------------------------|--------------------------------------------------------------------------------------------|
| Hong                                     | Sui               |                              | MD               | Department to Neurology, Pingdu Hospital of Traditional Chinese Medicine                                                                                                                                                  | Qingdao, Shandong Province, China        | Imaging assessment                                      | Imaging Core-lab                                                                           |
| Weiwu                                    | Hu                |                              | MD               | Department to Neurology, the First Traditional Chinese Medicine Hospital of Changde                                                                                                                                       | Changde, Hunan Province, China           | Imaging assessment                                      | Imaging Core-lab                                                                           |
| Long                                     | Li                |                              | MD               | Departments of Neurosurgery and Interventional Neuroradiology, Xuanwu Hospital, China International Neuroscience Institute, Capital Medical University, China National Clinical Research Center for Neurological Diseases | Beijing, China                           | Imaging assessment                                      | Imaging Core-lab                                                                           |
| Yao                                      | Feng              |                              | MD               | Departments of Neurosurgery and Interventional Neuroradiology, Xuanwu Hospital, China International Neuroscience Institute, Capital Medical University, China National Clinical Research Center for Neurological Diseases | Beijing, China                           | Imaging assessment                                      | Imaging Core-lab                                                                           |

Supplemental Online Content: Nonauthor Collaborators

\*First name, last name, and suffix (if applicable) are required and will appear in PubMed.

| *First Name and Middle Initial(s) | *Last Name | *Suffix (eg, Jr, III) | Academic Degrees | Institution                                                                                                                                                                                                                  | Location (city, state/province, country) | Role or Contribution, eg, chair, principal investigator | Group (if more than 1 Group listed in the byline) and/or Subgroup (eg, Steering Committee) |
|-----------------------------------|------------|-----------------------|------------------|------------------------------------------------------------------------------------------------------------------------------------------------------------------------------------------------------------------------------|------------------------------------------|---------------------------------------------------------|--------------------------------------------------------------------------------------------|
| Peng                              | Gao        |                       | MD               | Departments of Neurosurgery and Interventional Neuroradiology, Xuanwu Hospital, China<br>International Neuroscience Institute, Capital Medical University, China National Clinical Research Center for Neurological Diseases | Beijing, China                           | Trial coordination                                      | Trial Coordinators                                                                         |
| Tao                               | Wang       |                       | MD               | Departments of Neurosurgery and Interventional Neuroradiology, Xuanwu Hospital, China<br>International Neuroscience Institute, Capital Medical University, China National Clinical Research Center for Neurological Diseases | Beijing, China                           | Trial coordination                                      | Trial Coordinators                                                                         |
| Haibo                             | Wang       |                       | PhD              | Peking University Clinical Research Institute, Peking University First Hospital                                                                                                                                              | Beijing, China                           | Statistical analysis                                    | Biostatisticians                                                                           |
| Yidan                             | Zhu        |                       | PhD              | Peking University Clinical Research Institute, Peking University First Hospital                                                                                                                                              | Beijing, China                           | Statistical analysis                                    | Biostatisticians                                                                           |

## Supplemental Online Content: Nonauthor Collaborators

\*First name, last name, and suffix (if applicable) are required and will appear in PubMed.

| *First Name and Middle Initial(s) | *Last Name | *Suffix (eg, Jr, III) | Academic Degrees | Institution                                                                                                                                                                                                                  | Location (city, state/province, country) | Role or Contribution, eg, chair, principal investigator | Group (if more than 1 Group listed in the byline) and/or Subgroup (eg, Steering Committee) |
|-----------------------------------|------------|-----------------------|------------------|------------------------------------------------------------------------------------------------------------------------------------------------------------------------------------------------------------------------------|------------------------------------------|---------------------------------------------------------|--------------------------------------------------------------------------------------------|
| Tao                               | Wang       |                       | MD               | Departments of Neurosurgery and Interventional Neuroradiology, Xuanwu Hospital, China<br>International Neuroscience Institute, Capital Medical University, China National Clinical Research Center for Neurological Diseases | Beijing, China                           | Site coordination                                       | Clinical Site Coordinators                                                                 |
| Bingjie                           | Zheng      |                       | MD               | Department of Neurosurgery, the 1st Affiliated Hospital of Harbin Medical University                                                                                                                                         | Harbin, Heilongjiang Province, China     | Site coordination                                       | Clinical Site Coordinators                                                                 |
| Peng                              | Qi         |                       | MD               | Department of Neurosurgery, Beijing Hospital of the Ministry of Health                                                                                                                                                       | Beijing, China                           | Site coordination                                       | Clinical Site Coordinators                                                                 |
| Kunpeng                           | Chen       |                       | MD               | Department of Neurosurgery, Beijing Hospital of the Ministry of Health                                                                                                                                                       | Beijing, China                           | Site coordination                                       | Clinical Site Coordinators                                                                 |
| Yingkun                           | He         |                       | MD               | Department of Intervention, Henan Provincial People's Hospital                                                                                                                                                               | Zhengzhou, Henan Province, China         | Site coordination                                       | Clinical Site Coordinators                                                                 |
| Jia                               | Yu         |                       | MD               | Department of Neurosurgery, Tangdu Hospital of Air Force Medical University                                                                                                                                                  | Xi'an, Shaanxi Province, China           | Site coordination                                       | Clinical Site Coordinators                                                                 |
| Weigang                           | Gong       |                       | MD               | Department of Neurology, Qilu Hospital of Shandong University                                                                                                                                                                | Ji'nan, Shandong Province, China         | Site coordination                                       | Clinical Site Coordinators                                                                 |
| Juan                              | Du         |                       | MD               | Department of Neurology, PLA 306 Hospital                                                                                                                                                                                    | Beijing, China                           | Site coordination                                       | Clinical Site Coordinators                                                                 |



Supplemental Online Content: Nonauthor Collaborators

\*First name, last name, and suffix (if applicable) are required and will appear in PubMed.

| <b>*First Name and Middle Initial(s)</b> | <b>*Last Name</b> | <b>*Suffix (eg, Jr, III)</b> | Academic Degrees | Institution                                                                             | Location (city, state/province, country) | Role or Contribution, eg, chair, principal investigator | Group (if more than 1 Group listed in the byline) and/or Subgroup (eg, Steering Committee) |
|------------------------------------------|-------------------|------------------------------|------------------|-----------------------------------------------------------------------------------------|------------------------------------------|---------------------------------------------------------|--------------------------------------------------------------------------------------------|
| Yongqiang                                | Cui               |                              | MD               | Department of Neurology, PLA 306 Hospital                                               | Beijing, China                           | Site coordination                                       | Clinical Site Coordinators                                                                 |
| Yachong                                  | Chen              |                              | MD               | Department of Neurosurgery, the 2nd Affiliated Hospital of Guangzhou Medical University | Guangzhou, Guangdong Province, China     | Site coordination                                       | Clinical Site Coordinators                                                                 |
