# Supplementary material
Source: PubMed Central journal article supplement (PMC9364128)
Supplement: jama-e2212000-s005.pdf [file jama-e2212000-s005.pdf]

## Data Sharing Statement

Gao. Effect of Stenting Plus Medical Therapy vs Medical Therapy Alone on Risk of Stroke and Death in Patients With Symptomatic Intracranial Stenosis. *JAMA*. Published August 09, 2022. doi:10.1001/jama.2022.12000

### Data

**Data available:** Yes

**Data types:** Deidentified participant data

**How to access data:** Data Sharing Statement: All data requests should be submitted to LJ for consideration at [liqunjiao@sina.cn](mailto:liqunjiao@sina.cn). Access to anonymised data may be granted following review.

**When available:** With publication

### Supporting Documents

**Document types:** None

### Additional Information

**Who can access the data:** Researchers whose proposed use of the data has been approved

**Types of analyses:** For publication

**Mechanisms of data availability:** signed data access agreement
